# Supplementary material
Source: ML conference proceedings conference paper supplement (https://proceedings.mlr.press/v130/wang21a.html)
Supplement: Supplementary file 1 [file wang21a-supp.pdf]

---

# Proof for “A comparative study on sampling with replacement vs Poisson sampling in optimal subsampling”

---

## A.1 Proofs

In this section, we prove all the theorems in the paper.

### A.1.1 Proof for Theorem 1

To prove Theorem 1, we first establish Lemma 1 and Lemma 2 in the following. Recall that

$$M_n(\boldsymbol{\theta}) = \frac{1}{n} \sum_{i=1}^n m(Z_i, \boldsymbol{\theta}).$$

For the sampling with replacement estimator in (2), let

$$M_s^*(\boldsymbol{\theta}) = \frac{1}{s} \sum_{i=1}^s \frac{m(Z_i^*, \boldsymbol{\theta})}{n\pi_i^*}.$$

**Lemma 1.** *Under Assumptions 3 and 5, if  $\|\tilde{\boldsymbol{\theta}}_R - \hat{\boldsymbol{\theta}}\| = o_P(1)$ , then conditional on  $\mathcal{D}_n$ ,*

$$B_s - \ddot{M}_n(\hat{\boldsymbol{\theta}}) = o_P(1),$$

where

$$\begin{aligned} \ddot{M}_n(\hat{\boldsymbol{\theta}}) &= \frac{1}{n} \sum_{i=1}^n \ddot{m}(Z_i, \hat{\boldsymbol{\theta}}), \\ B_s &= \int_0^1 \frac{1}{s} \sum_{i=1}^s \frac{\ddot{m}\{Z_i^*, \hat{\boldsymbol{\theta}} + \lambda(\tilde{\boldsymbol{\theta}}_R - \hat{\boldsymbol{\theta}})\}}{n\pi_i^*} d\lambda. \end{aligned}$$

In Lemma 1, the notation  $o_P(1)$  means convergence to 0 in probability. Here the probability is conditional probability. From Xiong and Li (2008); Cheng and Huang (2010), a sequence converges to 0 in conditional probability is equivalent to the fact that it converges to 0 in unconditional probability. Thus we use  $o_P(1)$  to indicate convergence to 0 either in unconditional or conditional probability.

*Proof.* Firstly, note that

$$\begin{aligned} \mathbb{E} \left( \frac{1}{s} \sum_{i=1}^s \frac{\psi(Z_i^*)}{n\pi_i^*} \middle| \mathcal{D}_n \right) &= \frac{1}{n} \sum_{i=1}^n \psi(Z_i) = \mathbb{E}\psi(Z) + o_P(1), \quad \text{and} \\ \mathbb{V} \left( \frac{1}{s} \sum_{i=1}^s \frac{\psi(Z_i^*)}{n\pi_i^*} \middle| \mathcal{D}_n \right) &= \frac{1}{s} \sum_{i=1}^n \frac{\psi^2(Z_i)}{n^2\pi_i} \leq \max_{i=1, \dots, n} \left( \frac{1}{n\pi_i} \right) \frac{1}{sn} \sum_{i=1}^n \psi^2(Z_i) = O_P(s^{-1}). \end{aligned}$$

Thus,

$$\frac{1}{s} \sum_{i=1}^s \frac{\psi(Z_i^*)}{n\pi_i^*} = O_{P|\mathcal{D}_n}(1).$$

For every  $k, l = 1, 2, \dots, d$ , from Lipschitz continuity, for  $\lambda \in (0, 1)$ , we have

$$\begin{aligned}
 & \left| \frac{1}{s} \sum_{i=1}^s \frac{\ddot{m}_{k,l}\{Z_i^*, \hat{\boldsymbol{\theta}} + \lambda(\tilde{\boldsymbol{\theta}}_R - \hat{\boldsymbol{\theta}})\}}{n\pi_i^*} - \frac{1}{s} \sum_{i=1}^s \frac{\ddot{m}_{k,l}(Z_i^*, \hat{\boldsymbol{\theta}})}{n\pi_i^*} \right| \\
 &= \lambda \|\tilde{\boldsymbol{\theta}}_R - \hat{\boldsymbol{\theta}}\| \frac{1}{s} \sum_{i=1}^s \frac{\psi(Z_i^*)}{n\pi_i^*} = o_P(1),
 \end{aligned} \tag{A.1}$$

and for any fixed  $\boldsymbol{\theta}$ , we have

$$\frac{1}{n} \sum_{i=1}^n \ddot{m}_{k,l}^2(Z_i, \hat{\boldsymbol{\theta}}) \leq \frac{2}{n} \sum_{i=1}^n \ddot{m}_{k,l}^2(Z_i, \boldsymbol{\theta}) + \frac{2\|\hat{\boldsymbol{\theta}} - \boldsymbol{\theta}\|^2}{n} \sum_{i=1}^n \psi^2(Z_i) = O_P(1). \tag{A.2}$$

In addition, according to (A.2),

$$\begin{aligned}
 \mathbb{E} \left\{ \frac{1}{s} \sum_{i=1}^s \frac{\ddot{m}_{k,l}(Z_i^*, \hat{\boldsymbol{\theta}})}{n\pi_i^*} \middle| \mathcal{D}_n \right\} &= \frac{1}{n} \sum_{i=1}^n \ddot{m}_{k,l}(Z_i, \hat{\boldsymbol{\theta}}), \\
 \mathbb{V} \left\{ \frac{1}{s} \sum_{i=1}^s \frac{\ddot{m}_{k,l}(Z_i^*, \hat{\boldsymbol{\theta}})}{n\pi_i^*} \middle| \mathcal{D}_n \right\} &= \frac{1}{s} \sum_{i=1}^s \frac{\ddot{m}_{k,l}^2(Z_i, \hat{\boldsymbol{\theta}})}{n^2 \pi_i} \\
 &\leq \max_{i=1,2,\dots,n} \left( \frac{1}{n\pi_i} \right) \frac{1}{sn} \sum_{i=1}^n \ddot{m}_{k,l}^2(Z_i, \hat{\boldsymbol{\theta}}) = O_P(s^{-1}).
 \end{aligned}$$

Thus, by Chebyshev's inequality, we have

$$\left| \frac{1}{s} \sum_{i=1}^s \frac{\ddot{m}_{k,l}(Z_i^*, \hat{\boldsymbol{\theta}})}{n\pi_i^*} - \frac{1}{n} \sum_{i=1}^n \ddot{m}_{k,l}(Z_i, \hat{\boldsymbol{\theta}}) \right| = O_{P|\mathcal{D}_n}(s^{-1/2}) = o_{P|\mathcal{D}_n}(1). \tag{A.3}$$

Combining (A.1) and (A.3), we have

$$\begin{aligned}
 \left| B_s - \frac{1}{n} \sum_{i=1}^n \ddot{m}_{k,l}(Z_i, \hat{\boldsymbol{\theta}}) \right| &\leq \int_0^1 \left| \frac{1}{s} \sum_{i=1}^s \frac{\ddot{m}_{k,l}\{Z_i^*, \hat{\boldsymbol{\theta}} + \lambda(\tilde{\boldsymbol{\theta}}_R - \hat{\boldsymbol{\theta}})\}}{n\pi_i^*} - \frac{1}{n} \sum_{i=1}^n \ddot{m}_{k,l}(Z_i, \hat{\boldsymbol{\theta}}) \right| d\lambda \\
 &\leq \int_0^1 \left[ \left| \frac{1}{s} \sum_{i=1}^s \frac{\ddot{m}_{k,l}\{Z_i^*, \hat{\boldsymbol{\theta}} + \lambda(\tilde{\boldsymbol{\theta}}_R - \hat{\boldsymbol{\theta}})\}}{n\pi_i^*} - \frac{1}{s} \sum_{i=1}^s \frac{\ddot{m}_{k,l}(Z_i^*, \hat{\boldsymbol{\theta}})}{n\pi_i^*} \right| \right. \\
 &\quad \left. + \left| \frac{1}{s} \sum_{i=1}^s \frac{\ddot{m}_{k,l}(Z_i^*, \hat{\boldsymbol{\theta}})}{n\pi_i^*} - \frac{1}{n} \sum_{i=1}^n \ddot{m}_{k,l}(Z_i, \hat{\boldsymbol{\theta}}) \right| \right] d\lambda \\
 &= o_{P|\mathcal{D}_n}(1).
 \end{aligned}$$

□

**Lemma 2.** Under Assumptions 4-5, given  $\mathcal{D}_n$ ,

$$\sqrt{s}\{\Lambda_R(\hat{\boldsymbol{\theta}})\}^{-1/2} \dot{M}_s^*(\hat{\boldsymbol{\theta}}) \rightarrow \mathbb{N}(\mathbf{0}, \mathbf{I}), \tag{A.4}$$

in conditional distribution.

*Proof.* Note that

$$\sqrt{s} \dot{M}_s^*(\hat{\boldsymbol{\theta}}) = \frac{1}{\sqrt{s}} \sum_{i=1}^s \frac{\dot{m}(Z_i^*, \hat{\boldsymbol{\theta}})}{n\pi_i^*} \equiv \frac{1}{\sqrt{s}} \sum_{i=1}^s \boldsymbol{\eta}_i \tag{A.5}$$

Given  $\mathcal{D}_n$ ,  $\boldsymbol{\eta}_1, \dots, \boldsymbol{\eta}_s$  are i.i.d, with

$$\mathbb{E}(\boldsymbol{\eta}|\mathcal{D}_n) = \frac{1}{n} \sum_{i=1}^n \dot{m}(Z_i, \hat{\boldsymbol{\theta}}) = \mathbf{0}, \text{ and} \tag{A.6}$$

$$\begin{aligned}
\mathbb{V}(\boldsymbol{\eta}_i|\mathcal{D}_n) &= \Lambda_R(\hat{\boldsymbol{\theta}}) = \frac{1}{n^2} \sum_{i=1}^n \frac{\dot{m}(Z_i, \hat{\boldsymbol{\theta}})\dot{m}^\top(Z_i, \hat{\boldsymbol{\theta}})}{\pi_i} \\
&\leq \max_{i=1, \dots, n} \left( \frac{1}{n\pi_i} \right) \frac{1}{n} \sum_{i=1}^n \dot{m}(Z_i, \hat{\boldsymbol{\theta}})\dot{m}^\top(Z_i, \hat{\boldsymbol{\theta}}) = O_P(1).
\end{aligned} \tag{A.7}$$

Meanwhile, for every  $\varepsilon > 0$  and some  $\delta \in (0, 2]$ ,

$$\begin{aligned}
\frac{1}{s} \sum_{i=1}^s \mathbb{E} \left\{ \|\boldsymbol{\eta}_i\|^2 I(\|\boldsymbol{\eta}_i\| > s^{1/2}\varepsilon) | \mathcal{D}_n \right\} &\leq \frac{1}{s^{1+\delta/2}\varepsilon^\delta} \sum_{i=1}^s \mathbb{E} \left\{ \|\boldsymbol{\eta}_i\|^{2+\delta} I(\|\boldsymbol{\eta}_i\| > s^{1/2}\varepsilon) | \mathcal{D}_n \right\} \\
&\leq \frac{1}{s^{1+\delta/2}\varepsilon^\delta} \sum_{i=1}^s \mathbb{E} (\|\boldsymbol{\eta}_i\|^{2+\delta} | \mathcal{D}_n) \leq \frac{1}{s^{\delta/2}n^{2+\delta}\varepsilon^\delta} \sum_{i=1}^n \frac{\|\dot{m}(Z_i, \hat{\boldsymbol{\theta}})\|^2}{\pi_i^{1+\delta}} \\
&= \max_{i=1, \dots, n} \left( \frac{1}{n\pi_i} \right)^{1+\delta} \frac{1}{ns^{\delta/2}\varepsilon^\delta} \sum_{i=1}^n \|\dot{m}(Z_i, \hat{\boldsymbol{\theta}})\|^2 = O_P(s^{-\delta/2}).
\end{aligned}$$

This shows that Lindeberg's condition is satisfied in probability. From (A.5), (A.6) and (A.7), by the Lindeberg-Feller central limit theorem (Proposition 2.27 of van der Vaart (1998)), conditionally on  $\mathcal{D}_n$ , (A.4) follows.  $\square$

*Proof of Theorem 1.* Based on Lemma 1 and Lemma 2, now we are ready to prove Theorem 1. By direct calculation, we have that for any  $\boldsymbol{\theta}$ ,

$$\mathbb{E}(M_s^*(\boldsymbol{\theta}) | \mathcal{D}_n) = M_n(\boldsymbol{\theta}).$$

By Chebyshev's inequality, for any  $\varepsilon > 0$ ,

$$\begin{aligned}
\mathbb{P} \{ |M_s^*(\boldsymbol{\theta}) - M_n(\boldsymbol{\theta})| \geq \varepsilon | \mathcal{D}_n \} &\leq \frac{\mathbb{V}\{M_s^*(\boldsymbol{\theta}) | \mathcal{D}_n\}}{\varepsilon^2} = \frac{1}{\varepsilon^2 sn^2} \sum_{i=1}^n \frac{m^2(Z_i, \boldsymbol{\theta})}{\pi_i} \\
&\leq \frac{1}{\varepsilon^2 s} \max_{i=1, \dots, n} \left( \frac{1}{n\pi_i} \right) \frac{1}{n} \sum_{i=1}^n m^2(Z_i, \boldsymbol{\theta}) = O_P(s^{-1}).
\end{aligned}$$

Thus, for every  $\boldsymbol{\theta}$ ,

$$M_s^*(\boldsymbol{\theta}) - M_n(\boldsymbol{\theta}) = o_{P|\mathcal{D}_n}(1). \tag{A.8}$$

Note that under Assumptions 1, 2, the parameter space is compact and  $\hat{\boldsymbol{\theta}}$  is the unique global maximum of the continuous concave function  $M_n(\boldsymbol{\theta})$ . Thus from Theorem 5.9 and its remark of van der Vaart (1998), conditionally on  $\mathcal{D}_n$ ,

$$\|\tilde{\boldsymbol{\theta}}_R - \hat{\boldsymbol{\theta}}\| = o_{P|\mathcal{D}_n}(1) = o_P(1). \tag{A.9}$$

The consistency ensures that  $\tilde{\boldsymbol{\theta}}_R$  is close to  $\hat{\boldsymbol{\theta}}$  as long as  $s$  is large. By Taylor expansion,

$$0 = \dot{M}_s^*(\tilde{\boldsymbol{\theta}}_R) = \dot{M}_s^*(\hat{\boldsymbol{\theta}}) + B_s(\tilde{\boldsymbol{\theta}}_R - \hat{\boldsymbol{\theta}}), \tag{A.10}$$

where

$$B_s = \int_0^1 \frac{1}{s} \sum_{i=1}^s \frac{\ddot{m}\{Z_i^*, \hat{\boldsymbol{\theta}} + \lambda(\tilde{\boldsymbol{\theta}}_R - \hat{\boldsymbol{\theta}})\}}{n\pi_i^*} d\lambda.$$

From (A.10) and Lemma 1,

$$0 = \dot{M}_s^*(\tilde{\boldsymbol{\theta}}_R) = \dot{M}_s^*(\hat{\boldsymbol{\theta}}) + \{\ddot{M}_n(\hat{\boldsymbol{\theta}}) + o_P(1)\}(\tilde{\boldsymbol{\theta}}_R - \hat{\boldsymbol{\theta}}), \tag{A.11}$$

which shows that

$$\tilde{\boldsymbol{\theta}}_R - \hat{\boldsymbol{\theta}} = -\{\ddot{M}_n(\hat{\boldsymbol{\theta}}) + o_P(1)\}^{-1} \dot{M}_s^*(\hat{\boldsymbol{\theta}})$$

$$= -\frac{1}{\sqrt{s}}\{\ddot{M}_n(\hat{\boldsymbol{\theta}}) + o_P(1)\}^{-1}\{\Lambda_R(\hat{\boldsymbol{\theta}})\}^{1/2}\sqrt{s}\{\Lambda_R(\hat{\boldsymbol{\theta}})\}^{-1/2}\dot{M}_s^*(\hat{\boldsymbol{\theta}}). \quad (\text{A.12})$$

By Lemma 2 and Slutsky's theorem, we can obtain that, given full data  $\mathcal{D}_n$  in probability,

$$\sqrt{s}\{V_R(\hat{\boldsymbol{\theta}})\}^{-1/2}(\tilde{\boldsymbol{\theta}}_R - \hat{\boldsymbol{\theta}}) \rightarrow \mathbb{N}(\mathbf{0}, \mathbf{I}), \quad (\text{A.13})$$

in conditional distribution. This means that for any  $\mathbf{x}$ , as  $s$  and  $n$  get large,

$$\mathbb{P}\left[\sqrt{s}\{V_R(\hat{\boldsymbol{\theta}})\}^{-1/2}(\tilde{\boldsymbol{\theta}}_R - \hat{\boldsymbol{\theta}}) < \mathbf{x} \mid \mathcal{D}_n\right] \rightarrow \Phi(\mathbf{x})$$

in probability, where  $\Phi(\mathbf{x})$  is the cumulative distribution function of the standard multivariate normal distribution. A conditional probability is a bounded random variable, for which convergence in probability to a constant implies convergence in the mean. Therefore, the convergence in (A.13) also holds in unconditional distribution.  $\square$

### A.1.2 Proof for Theorem 2

To prove Theorem 2, we first establish the following Lemmas 3 and 4. Let  $\nu_i = 1$  if the  $i$ -th data point is selected in the subsample and  $\nu_i = 0$  otherwise. The estimator in (2) is the same as the maximizer of

$$M_P^*(\boldsymbol{\theta}) = \frac{1}{n} \sum_{i=1}^{s^*} \frac{m(Z_i^*, \boldsymbol{\theta})}{s\pi_i^*} = \frac{1}{n} \sum_{i=1}^n \frac{\nu_i m(Z_i, \boldsymbol{\theta})}{s\pi_i}.$$

Here, we use  $s$  to replace  $s^*$  in (2) for convenience, and the resulting estimator is identical to  $\tilde{\boldsymbol{\theta}}_P$ .

**Lemma 3.** *If Assumptions 4-5 hold, then, given  $\mathcal{D}_n$ ,*

$$\sqrt{s}\{\Lambda_P(\hat{\boldsymbol{\theta}})\}^{-1/2}\dot{M}_P^*(\hat{\boldsymbol{\theta}}) \rightarrow \mathbb{N}(\mathbf{0}, \mathbf{I}),$$

in conditional distribution, where

$$\Lambda_P(\hat{\boldsymbol{\theta}}) = \frac{1}{n^2} \sum_{i=1}^n \frac{(1 - s\pi_i)\dot{m}(Z_i, \hat{\boldsymbol{\theta}})\dot{m}^T(Z_i, \hat{\boldsymbol{\theta}})}{\pi_i}.$$

*Proof.* Write

$$\sqrt{s}\dot{M}_P^*(\hat{\boldsymbol{\theta}}) = \sum_{i=1}^n \frac{\nu_i \dot{m}(Z_i, \hat{\boldsymbol{\theta}})}{n\sqrt{s\pi_i}} \equiv \sum_{i=1}^n \boldsymbol{\eta}_{Pi}.$$

By direct calculation and according to the definition of  $\hat{\boldsymbol{\theta}}$ ,

$$\mathbb{E}\left(\sum_{i=1}^n \boldsymbol{\eta}_{Pi} \mid \mathcal{D}_n\right) = \sqrt{s} \sum_{i=1}^n \frac{\dot{m}(Z_i, \hat{\boldsymbol{\theta}})}{n} = \mathbf{0},$$

and

$$\begin{aligned} \mathbb{V}\left(\sum_{i=1}^n \boldsymbol{\eta}_{Pi} \mid \mathcal{D}_n\right) &= \frac{1}{n^2} \sum_{i=1}^n \frac{\mathbb{V}(\nu_i \mid \mathcal{D}_n)\dot{m}(Z_i, \hat{\boldsymbol{\theta}})\dot{m}^T(Z_i, \hat{\boldsymbol{\theta}})}{r\pi_i^2} \\ &= \frac{1}{n^2} \sum_{i=1}^n \frac{(1 - s\pi_i)\dot{m}(Z_i, \hat{\boldsymbol{\theta}})\dot{m}^T(Z_i, \hat{\boldsymbol{\theta}})}{\pi_i} = \Lambda_P(\hat{\boldsymbol{\theta}}) \\ &\leq \left(\max_{i=1,2,\dots,n} \frac{1}{n\pi_i}\right) \frac{1}{n} \sum_{i=1}^n \dot{m}(Z_i, \hat{\boldsymbol{\theta}})\dot{m}^T(Z_i, \hat{\boldsymbol{\theta}}) = O_P(1). \end{aligned}$$

Next, we check Lindeberg's condition in conditional distribution. Note that for  $\rho \in (0, 2]$  and any  $\varepsilon > 0$ ,

$$\begin{aligned}
& \sum_{i=1}^n \mathbb{E} \left\{ \|\boldsymbol{\eta}_{P_i}\| I(\|\boldsymbol{\eta}_{P_i}\| > \varepsilon) \middle| \mathcal{D}_n \right\} \leq \frac{1}{\varepsilon^\rho} \sum_{i=1}^n \mathbb{E} \left\{ \|\boldsymbol{\eta}_{P_i}\|^{2+\rho} I(\|\boldsymbol{\eta}_{P_i}\| > \varepsilon) \middle| \mathcal{D}_n \right\} \\
& \leq \frac{1}{\varepsilon^\rho} \sum_{i=1}^n \mathbb{E} \left( \|\boldsymbol{\eta}_{P_i}\|^{2+\rho} \middle| \mathcal{D}_n \right) = \frac{1}{\varepsilon^\rho} \mathbb{E} \left\{ \sum_{i=1}^n \frac{\nu_i^{2+\rho} \|\dot{m}(Z_i, \hat{\boldsymbol{\theta}})\|^{2+\rho}}{n^{2+\rho} s^{1+\rho/2} \pi_i^{2+\rho}} \middle| \mathcal{D}_n \right\} \\
& = \frac{1}{\varepsilon^\rho} \sum_{i=1}^n \frac{\|\dot{m}(Z_i, \hat{\boldsymbol{\theta}})\|^{2+\rho}}{n^{2+\rho} s^{\rho/2} \pi_i^{1+\rho}} \\
& \leq \max_{i=1,2,\dots,n} \left( \frac{1}{n\pi_i} \right)^{1+\rho} \frac{1}{s^{\rho/2} \varepsilon^\rho n} \sum_{i=1}^n \|\dot{m}(Z_i, \hat{\boldsymbol{\theta}})\|^{2+\rho} = O_P(s^{-\rho/2}) = o_P(1).
\end{aligned}$$

According to the Lindeberg-Feller Central Limit Theorem (van der Vaart, 1998, cf.), given  $\mathcal{D}_n$ ,

$$\sqrt{s} \{ \Lambda_P(\hat{\boldsymbol{\theta}}) \}^{-1/2} \dot{M}_P^*(\hat{\boldsymbol{\theta}}) \rightarrow \mathbb{N}(\mathbf{0}, \mathbf{I}),$$

in conditional distribution. □

**Lemma 4.** *Under Assumptions 3 and 5, for any  $\mathbf{u}_s = o_P(1)$ , conditional on  $\mathcal{D}_n$ ,*

$$\frac{1}{n} \sum_{i=1}^n \frac{\nu_i \ddot{m}(Z_i, \hat{\boldsymbol{\theta}} + \mathbf{u}_s)}{s\pi_i} - \frac{1}{n} \sum_{i=1}^n \ddot{m}(Z_i, \hat{\boldsymbol{\theta}}) = o_P(1).$$

*Proof.* First, note that

$$\frac{1}{n} \sum_{i=1}^n \frac{\nu_i \psi(Z_i)}{s\pi_i} = O_{P|\mathcal{D}_n}(1), \tag{A.14}$$

by Chebyshev's inequality and the fact that

$$\begin{aligned}
\mathbb{E} \left( \frac{1}{n} \sum_{i=1}^n \frac{\nu_i \psi(Z_i)}{s\pi_i} \middle| \mathcal{D}_n \right) &= \frac{1}{n} \sum_{i=1}^n \frac{\psi(Z_i) \mathbb{E}(\nu_i | \mathcal{D}_n)}{s\pi_i} = \frac{1}{n} \sum_{i=1}^n \psi(Z_i) = \mathbb{E}\{\psi(Z_i)\} + o_P(1), \\
\mathbb{V} \left( \frac{1}{n} \sum_{i=1}^n \frac{\nu_i \psi(Z_i)}{s\pi_i} \middle| \mathcal{D}_n \right) &= \frac{1}{n^2} \sum_{i=1}^n \frac{\psi^2(Z_i) \mathbb{V}(\nu_i | \mathcal{D}_n)}{s^2 \pi_i^2} \leq \frac{1}{n^2} \sum_{i=1}^n \frac{\psi^2(Z_i) \mathbb{E}(\nu_i^2)}{s^2 \pi_i^2} \\
&= \frac{1}{n^2} \sum_{i=1}^n \frac{\psi^2(Z_i)}{s\pi_i} \leq \frac{1}{sn} \sum_{i=1}^n \psi^2(Z_i) \max_{i=1,2,\dots,n} \frac{1}{n\pi_i} = O_P(s^{-1}).
\end{aligned}$$

Thus, for every  $k, l = 1, 2, \dots, d$ , from Assumption 3, we have

$$\left| \frac{1}{n} \sum_{i=1}^n \frac{\nu_i \ddot{m}_{k,l}(Z_i, \hat{\boldsymbol{\theta}} + \mathbf{u}_s)}{s\pi_i} - \frac{1}{n} \sum_{i=1}^n \frac{\nu_i \ddot{m}_{k,l}(Z_i, \hat{\boldsymbol{\theta}})}{s\pi_i} \right| \leq \frac{\|\mathbf{u}_s\|}{n} \sum_{i=1}^n \frac{\nu_i \psi(Z_i)}{s\pi_i} = o_P(1).$$

which shows that

$$\frac{1}{n} \sum_{i=1}^n \frac{\nu_i \ddot{m}(Z_i, \hat{\boldsymbol{\theta}} + \mathbf{u}_s)}{s\pi_i} - \frac{1}{n} \sum_{i=1}^n \frac{\nu_i \ddot{m}(Z_i, \hat{\boldsymbol{\theta}})}{s\pi_i} = o_P(1). \tag{A.15}$$

According to (A.2), for every  $k, l = 1, 2, \dots, d$

$$\begin{aligned}
\mathbb{E} \left( \frac{1}{n} \sum_{i=1}^n \frac{\nu_i \ddot{m}_{k,l}(Z_i, \hat{\boldsymbol{\theta}})}{s\pi_i} \middle| \mathcal{D}_n \right) &= \frac{1}{n} \sum_{i=1}^n \ddot{m}_{k,l}(Z_i, \hat{\boldsymbol{\theta}}), \\
\mathbb{V} \left( \frac{1}{n} \sum_{i=1}^n \frac{\nu_i \ddot{m}_{k,l}(Z_i, \hat{\boldsymbol{\theta}})}{s\pi_i} \middle| \mathcal{D}_n \right) &= \frac{1}{sn^2} \sum_{i=1}^n \frac{(1 - s\pi_i) \ddot{m}_{k,l}^2(Z_i, \hat{\boldsymbol{\theta}})}{\pi_i} \leq \frac{1}{sn^2} \sum_{i=1}^n \frac{\ddot{m}_{k,l}^2(Z_i, \hat{\boldsymbol{\theta}})}{\pi_i}
\end{aligned}$$

$$\leq \max_{i=1,2,\dots,n} \left( \frac{1}{n\pi_i} \right) \frac{1}{sn} \sum_{i=1}^n \ddot{m}_{k,l}^2(Z_i, \hat{\boldsymbol{\theta}}) = O_P(s^{-1}).$$

Thus, Chebyshev's inequality tells us that

$$\frac{1}{n} \sum_{i=1}^n \frac{\nu_i \ddot{m}(Z_i, \hat{\boldsymbol{\theta}})}{s\pi_i} - \frac{1}{n} \sum_{i=1}^n \ddot{m}(Z_i, \hat{\boldsymbol{\theta}}) = O_{P|\mathcal{D}_n}(s^{-1/2}) = o_P(1). \quad (\text{A.16})$$

Therefore, combining (A.15) and (A.16), we have

$$\frac{1}{n} \sum_{i=1}^n \frac{\nu_i \ddot{m}(Z_i, \hat{\boldsymbol{\theta}} + \mathbf{u}_s)}{s\pi_i} - \frac{1}{n} \sum_{i=1}^n \ddot{m}(Z_i, \hat{\boldsymbol{\theta}}) = o_P(1).$$

□

*Proof of Theorem 2.* Denote

$$\gamma_P(\mathbf{u}) = sM_P^*(\hat{\boldsymbol{\theta}} + \mathbf{u}/\sqrt{s}) - sM_P^*(\hat{\boldsymbol{\theta}}).$$

Under Assumption 2,  $\sqrt{s}(\tilde{\boldsymbol{\theta}}_P - \hat{\boldsymbol{\theta}})$  is the unique maximizer of  $\gamma_P(\mathbf{u})$  as  $\tilde{\boldsymbol{\theta}}_P$  is the unique maximizer of  $M_P^*(\hat{\boldsymbol{\theta}} + \mathbf{u}/\sqrt{s})$ . By Taylor's expansion,

$$\gamma_P(\mathbf{u}) = \sqrt{s}\mathbf{u}^T \dot{M}_P^*(\hat{\boldsymbol{\theta}}) + \frac{1}{2}\mathbf{u}^T \ddot{M}_P^*(\hat{\boldsymbol{\theta}} + \dot{\mathbf{u}}/\sqrt{s})\mathbf{u}$$

where  $\dot{\mathbf{u}}$  lies between  $\mathbf{0}$  and  $\mathbf{u}/\sqrt{s}$ . From Lemma 3  $\sqrt{s}\dot{M}_P^*(\hat{\boldsymbol{\theta}})$  is stochastically bounded in conditional probability given  $\mathcal{D}_n$ . From Lemma 4, conditional on  $\mathcal{D}_n$ ,  $\ddot{M}_P^*(\hat{\boldsymbol{\theta}} + \dot{\mathbf{u}}/\sqrt{s}) - \ddot{M}_n(\hat{\boldsymbol{\theta}}) = o_P(1)$  and  $\ddot{M}_n(\hat{\boldsymbol{\theta}})$  converges to a positive-definite matrix.

Thus from the Basic Corollary in page 2 of Hjort and Pollard Hjort and Pollard (2011), the maximizer of  $s\gamma_P(\mathbf{u})$ ,  $\sqrt{s}(\tilde{\boldsymbol{\theta}}_P - \hat{\boldsymbol{\theta}})$ , satisfies that

$$\sqrt{s}(\tilde{\boldsymbol{\theta}}_P - \hat{\boldsymbol{\theta}}) = \ddot{M}_n^{-1}(\hat{\boldsymbol{\theta}})\sqrt{s}\dot{M}_P^*(\hat{\boldsymbol{\theta}}) + o_P(1), \quad (\text{A.17})$$

which implies that

$$\sqrt{s}\{V_P(\hat{\boldsymbol{\theta}})\}^{-1/2}(\tilde{\boldsymbol{\theta}}_P - \hat{\boldsymbol{\theta}}) \rightarrow \mathbb{N}(\mathbf{0}, \mathbf{I}), \quad (\text{A.18})$$

in conditional distribution. Thus, by argumentation similar to that used in the proof of Theorem 1, we know that the convergence also holds in unconditional distribution, and this finishes the proof. □

### A.1.3 Proof of Theorem 3

*Proof of Theorem 3.* For the result in (8),

$$\text{tr}\{\Lambda_R(\hat{\boldsymbol{\theta}})\} = \frac{1}{n^2} \sum_{i=1}^n \frac{\|\dot{m}(Z_i, \hat{\boldsymbol{\theta}})\|^2}{\pi_i} = \frac{1}{n^2} \sum_{i=1}^n \pi_i \sum_{i=1}^n \frac{\|\dot{m}(Z_i, \hat{\boldsymbol{\theta}})\|^2}{\pi_i} \geq \frac{1}{n^2} \left\{ \sum_{i=1}^n \|\dot{m}(Z_i, \hat{\boldsymbol{\theta}})\| \right\}^2.$$

Here, the last step is from the Cauchy-Schwarz inequality and the equality holds if and only if  $\pi_i \propto \|\dot{m}(Z_i, \hat{\boldsymbol{\theta}})\|$ . □

### A.1.4 Proof of Theorem 4

*Proof.* Note that

$$\text{tr}\{\Lambda_P(\hat{\boldsymbol{\theta}})\} = \text{tr} \left\{ \frac{1}{n^2} \sum_{i=1}^n \frac{(1 - s\pi_i)\dot{m}(Z_i, \hat{\boldsymbol{\theta}})\dot{m}^T(Z_i, \hat{\boldsymbol{\theta}})}{\pi_i} \right\}$$

$$= \frac{1}{n^2} \left[ \sum_{i=1}^n \frac{\|\dot{m}(Z_i, \hat{\theta})\|^2}{\pi_i} - s \sum_{i=1}^n \|\dot{m}(Z_i, \hat{\theta})\|^2 \right].$$

Thus, minimizing  $\text{tr}\{\Lambda_P(\hat{\theta})\}$  is equal to minimizing  $\sum_{i=1}^n \frac{\|\dot{m}(Z_i, \hat{\theta})\|^2}{\pi_i}$ . For  $i = 1, \dots, n$ , let  $t_i = \|\dot{m}(Z_i, \hat{\theta})\|$  and let  $t_{(i)}$  denote the order statistics of  $\|\dot{m}(Z_i, \hat{\theta})\|$ , i.e.,  $t_{(i)} = \|\dot{m}(Z, \hat{\theta})\|_{(i)}$ . The optimization problem of minimizing  $\text{tr}\{\Lambda_P(\hat{\theta})\}$  subject to the constrains on  $\pi_i$  can be presented as minimizing

$$T(\pi_1, \pi_2, \dots, \pi_n) = \sum_{i=1}^n \frac{t_{(i)}^2}{\pi_i}, \quad (\text{A.19})$$

$$\text{subject to } \sum_{i=1}^n \pi_i = 1 \quad \text{and} \quad 0 \leq \pi_i \leq \frac{1}{s}, i = 1, 2, \dots, n.$$

Defining slack variables  $\omega_1^2, \omega_2^2, \dots, \omega_n^2$ , to use Lagrangian multiplier method, we can construct

$$H(\pi_1, \dots, \pi_n, \tau, \mu_1, \dots, \mu_n, \omega_1, \dots, \omega_n) = \sum_{i=1}^n \frac{t_{(i)}^2}{\pi_i} + \tau \left( \sum_{i=1}^n \pi_i - 1 \right) + \sum_{i=1}^n \mu_i \left( \pi_i + \omega_i^2 - \frac{1}{s} \right).$$

By taking the derivatives, the Karush–Kuhn–Tucker (KKT) conditions (Nocedal and Wright, 1999) are

$$\frac{\partial H}{\partial \pi_i} = -\frac{t_{(i)}^2}{\pi_i^2} + \tau + \mu_i = 0, \quad i = 1, 2, \dots, n. \quad (\text{A.20})$$

$$\frac{\partial H}{\partial \tau} = \sum_{i=1}^n \pi_i - 1 = 0, \quad (\text{A.21})$$

$$\frac{\partial H}{\partial \mu_i} = \pi_i + \omega_i^2 = \frac{1}{s}, \quad i = 1, 2, \dots, n. \quad (\text{A.22})$$

$$\frac{\partial H}{\partial \omega_i} = 2\mu_i \omega_i = 0, \quad i = 1, 2, \dots, n. \quad (\text{A.23})$$

$$\mu_i \geq 0, \quad i = 1, 2, \dots, n. \quad (\text{A.24})$$

From (A.20), we have

$$\pi_i = \frac{t_{(i)}}{\sqrt{\tau + \mu_i}}, \quad i = 1, 2, \dots, n. \quad (\text{A.25})$$

Combining it with (A.22), we have

$$\frac{t_{(i)}}{\sqrt{\tau + \mu_i}} + \omega_i^2 = \frac{1}{s}, \quad i = 1, 2, \dots, n. \quad (\text{A.26})$$

According to (A.23), at least one of  $\mu_i$  and  $\omega_i$  must be 0. From (A.25) and (A.26),

$$\text{if } t_{(i)} < \frac{\sqrt{\tau}}{s}, \quad \mu = 0 \text{ and } \pi_i = \frac{t_{(i)}}{\sqrt{\tau}} < \frac{1}{s}; \quad (\text{A.27})$$

$$\text{if } t_{(i)} \geq \frac{\sqrt{\tau}}{s}, \quad \omega_i = 0 \text{ and } \pi_i = \frac{t_{(i)}}{\sqrt{\tau + \mu_i}} = \frac{1}{s}. \quad (\text{A.28})$$

Thus, letting  $g$  be the number of cases that  $t_{(i)} \geq \frac{\sqrt{\tau}}{s}$ , from (A.21) and the fact that  $t_{(i)}$  is non-decreasing in  $i$ ,

$$1 = \sum_{i=1}^n \pi_i = \sum_{i=1}^{n-g} \frac{t_{(i)}}{\sqrt{\tau}} + \sum_{i=n-g+1}^n \frac{1}{s} = \frac{\sum_{i=1}^{n-g} t_{(i)}}{\sqrt{\tau}} + \frac{g}{s}, \quad (\text{A.29})$$

which shows that

$$\sqrt{\tau} = \frac{s}{s-g} \sum_{i=1}^{n-g} t_{(i)}. \quad (\text{A.30})$$

Combining (A.27), (A.28), and (A.30),

$$\pi_i = \begin{cases} \frac{t_{(i)}(s-g)}{s \sum_{i=1}^{n-g} t_{(i)}}, & \text{for } i = 1, 2, \dots, n-g; \\ \frac{1}{s}, & \text{for } i = n-g+1, \dots, n. \end{cases} \quad (\text{A.31})$$

$$\pi_i = \begin{cases} \frac{1}{s}, & \text{for } i = n-g+1, \dots, n. \end{cases} \quad (\text{A.32})$$

From (A.30),

$$H = \frac{\sum_{i=1}^{n-g} t_{(i)}}{s-g} = \frac{\sqrt{T}}{s}, \quad (\text{A.33})$$

Thus, from (A.27) and (A.28), we know  $t_{(i)} < H$  for  $i = 1, 2, \dots, n-g$ , and  $t_{(i)} \geq H$ , for  $i = n-g+1, \dots, n$ . Therefore

$$\sum_{i=1}^n (t_{(i)} \wedge H) = \sum_{i=1}^{n-g} t_{(i)} + \sum_{i=n-g+1}^n H = sH \quad (\text{A.34})$$

Thus, from (A.31), for  $i = 1, 2, \dots, n-g$ ,

$$\pi_i = \frac{t_{(i)}}{sH} = \frac{t_{(i)} \wedge H}{\sum_{i=1}^n (t_{(i)} \wedge H)}; \quad (\text{A.35})$$

from (A.32), for  $i = n-g+1, \dots, n$ ,

$$\pi_i = \frac{H}{sH} = \frac{t_{(i)} \wedge H}{\sum_{i=1}^n (t_{(i)} \wedge H)}. \quad (\text{A.36})$$

For the result under the A-optimality, define  $t_{(i)} = \|\ddot{M}_n^{-1}(\hat{\boldsymbol{\theta}}) \dot{m}(Z, \hat{\boldsymbol{\theta}})\|_{(i)}$  and the proof is the same as the used for the L-optimality.  $\square$

### A.1.5 Proof of Theorem 5

We prove Theorem 5 from establishing the following lemmas.

**Lemma 5.** *Under Assumption 3, if  $\|\tilde{\boldsymbol{\theta}}_R^\alpha - \hat{\boldsymbol{\theta}}\| = o_P(1)$ , then conditional on  $\mathcal{D}_n$  and  $\tilde{\boldsymbol{\theta}}_R^{0*}$ ,*

$$B_s^{\tilde{\boldsymbol{\theta}}_R^{0*}} - \ddot{M}_n(\hat{\boldsymbol{\theta}}) = o_P(1), \quad (\text{A.37})$$

where

$$B_s^{\tilde{\boldsymbol{\theta}}_R^{0*}} = \int_0^1 \frac{1}{s} \sum_{i=1}^s \frac{\ddot{m}\{Z_i^*, \hat{\boldsymbol{\theta}} + \lambda(\tilde{\boldsymbol{\theta}}_R^\alpha - \hat{\boldsymbol{\theta}})\}}{n\tilde{\pi}_{R\alpha i}^{\text{opt}*}} d\lambda.$$

*Proof.* For every  $k, l = 1, 2, \dots, d$ , from Lipschitz continuity, we have

$$\begin{aligned} & \left| \frac{1}{s} \sum_{i=1}^s \frac{\ddot{m}_{k,l}\{Z_i^*, \hat{\boldsymbol{\theta}} + \lambda(\tilde{\boldsymbol{\theta}}_R^\alpha - \hat{\boldsymbol{\theta}})\}}{n\tilde{\pi}_{R\alpha i}^{\text{opt}*}} - \frac{1}{s} \sum_{i=1}^s \frac{\ddot{m}_{k,l}(Z_i^*, \hat{\boldsymbol{\theta}})}{n\tilde{\pi}_{R\alpha i}^{\text{opt}*}} \right| \\ & \leq \frac{1}{s} \sum_{i=1}^s \frac{\psi(Z_i^*) \|\lambda(\tilde{\boldsymbol{\theta}}_R^\alpha - \hat{\boldsymbol{\theta}})\|}{n\tilde{\pi}_{R\alpha i}^{\text{opt}*}} \leq \lambda \|\tilde{\boldsymbol{\theta}}_R^\alpha - \hat{\boldsymbol{\theta}}\| \frac{1}{s} \sum_{i=1}^s \frac{\psi(Z_i^*)}{\alpha} = \|\tilde{\boldsymbol{\theta}}_R^\alpha - \hat{\boldsymbol{\theta}}\| O_P(1) = o_P(1). \end{aligned} \quad (\text{A.38})$$

According to (A.2), we have

$$\mathbb{E} \left( \frac{1}{s} \sum_{i=1}^s \frac{\ddot{m}_{k,l}(Z_i^*, \hat{\boldsymbol{\theta}})}{n\tilde{\pi}_{R\alpha i}^{\text{opt}*}} \middle| \mathcal{D}_n, \tilde{\boldsymbol{\theta}}_R^{0*} \right) = \frac{1}{n} \sum_{i=1}^n \ddot{m}_{k,l}(Z_i, \hat{\boldsymbol{\theta}}),$$



$$\mathbb{V} \left( \frac{1}{s} \sum_{i=1}^s \frac{\ddot{m}_{k,l}(Z_i^*, \hat{\boldsymbol{\theta}})}{n \tilde{\pi}_{R\alpha i}^{\text{opt}*}} \middle| \mathcal{D}_n, \tilde{\boldsymbol{\theta}}_R^{0*} \right) = \frac{1}{s} \sum_{i=1}^n \frac{\ddot{m}_{k,l}^2(Z_i, \hat{\boldsymbol{\theta}})}{n^2 \pi_{R\alpha i}^{\text{opt}}} \leq \frac{1}{\alpha s n} \sum_{i=1}^n \ddot{m}_{k,l}^2(Z_i, \hat{\boldsymbol{\theta}}) = O_P(s^{-1}).$$

Thus, by Chebyshev's inequality, similar to (A.3), we have

$$\left\| \frac{1}{s} \sum_{i=1}^s \frac{\ddot{m}(Z_i^*, \hat{\boldsymbol{\theta}})}{n \tilde{\pi}_{R\alpha i}^{\text{opt}*}} - \frac{1}{n} \sum_{i=1}^n \ddot{m}(Z_i, \hat{\boldsymbol{\theta}}) \right\| = o_P|_{\mathcal{D}_n, \tilde{\boldsymbol{\theta}}_R^{0*}}(1). \quad (\text{A.39})$$

Combining (A.38) and (A.39), we have

$$\begin{aligned} \left\| B_s - \frac{1}{n} \sum_{i=1}^n \ddot{m}(Z_i, \hat{\boldsymbol{\theta}}) \right\| &\leq \int_0^1 \left\| \frac{1}{s} \sum_{i=1}^s \frac{\ddot{m}\{Z_i^*, \hat{\boldsymbol{\theta}} + \lambda(\tilde{\boldsymbol{\theta}}_R^\alpha - \hat{\boldsymbol{\theta}})\}}{n \tilde{\pi}_{R\alpha i}^{\text{opt}*}} - \frac{1}{n} \sum_{i=1}^n \ddot{m}(Z_i, \hat{\boldsymbol{\theta}}) \right\| d\lambda \\ &\leq \int_0^1 \left[ \left\| \frac{1}{s} \sum_{i=1}^s \frac{\ddot{m}\{Z_i^*, \hat{\boldsymbol{\theta}} + \lambda(\tilde{\boldsymbol{\theta}}_R^\alpha - \hat{\boldsymbol{\theta}})\}}{n \tilde{\pi}_{R\alpha i}^{\text{opt}*}} - \frac{1}{s} \sum_{i=1}^s \frac{\ddot{m}(Z_i^*, \hat{\boldsymbol{\theta}})}{n \tilde{\pi}_{R\alpha i}^{\text{opt}*}} \right\| \right. \\ &\quad \left. + \left\| \frac{1}{s} \sum_{i=1}^s \frac{\ddot{m}(Z_i^*, \hat{\boldsymbol{\theta}})}{n \tilde{\pi}_{R\alpha i}^{\text{opt}*}} - \frac{1}{n} \sum_{i=1}^n \ddot{m}(Z_i, \hat{\boldsymbol{\theta}}) \right\| \right] d\lambda = o_P(1), \end{aligned}$$

which finishes the proof.  $\square$

**Lemma 6.** *If Assumption 4 hold, then given  $\mathcal{D}_n$  and  $\tilde{\boldsymbol{\theta}}_R^{0*}$ ,*

$$\sqrt{s} \{ \Lambda_R^\alpha(\tilde{\boldsymbol{\theta}}_R^{0*}) \}^{-1/2} \dot{M}_{R\alpha}^*(\hat{\boldsymbol{\theta}}) \rightarrow \mathbb{N}(\mathbf{0}, \mathbf{I}), \quad (\text{A.40})$$

*in conditional distribution, where*

$$\dot{M}_{R\alpha}^*(\hat{\boldsymbol{\theta}}) = \frac{1}{ns} \sum_{i=1}^s \frac{\dot{m}(Z_i^*, \hat{\boldsymbol{\theta}})}{\tilde{\pi}_{R\alpha i}^{\text{opt}*}}, \quad \text{and} \quad \Lambda_R^\alpha(\tilde{\boldsymbol{\theta}}_R^{0*}) = \frac{1}{n^2} \sum_{i=1}^n \frac{\dot{m}(Z_i, \hat{\boldsymbol{\theta}}) \dot{m}^\text{T}(Z_i, \hat{\boldsymbol{\theta}})}{\tilde{\pi}_{R\alpha i}^{\text{opt}}}.$$

*Proof.* Note that

$$\sqrt{s} \dot{M}_{R\alpha}^*(\hat{\boldsymbol{\theta}}) = \frac{1}{\sqrt{s}} \sum_{i=1}^s \frac{\dot{m}(Z_i^*, \hat{\boldsymbol{\theta}})}{n \tilde{\pi}_{R\alpha i}^{\text{opt}*}} \equiv \frac{1}{\sqrt{s}} \sum_{i=1}^s \boldsymbol{\eta}_i^{\tilde{\boldsymbol{\theta}}_R^{0*}}. \quad (\text{A.41})$$

Given  $\mathcal{D}_n$  and  $\tilde{\boldsymbol{\theta}}_R^{0*}$ ,  $\boldsymbol{\eta}_1^{\tilde{\boldsymbol{\theta}}_R^{0*}}, \dots, \boldsymbol{\eta}_s^{\tilde{\boldsymbol{\theta}}_R^{0*}}$  are i.i.d, with

$$\mathbb{E}(\boldsymbol{\eta}_i^{\tilde{\boldsymbol{\theta}}_R^{0*}} | \mathcal{D}_n, \tilde{\boldsymbol{\theta}}_R^{0*}) = \frac{1}{n} \sum_{i=1}^n \dot{m}(Z_i, \hat{\boldsymbol{\theta}}) = \mathbf{0}, \quad \text{and} \quad (\text{A.42})$$

$$\mathbb{V}(\boldsymbol{\eta}_i^{\tilde{\boldsymbol{\theta}}_R^{0*}} | \mathcal{D}_n, \tilde{\boldsymbol{\theta}}_R^{0*}) = \mathbb{E} \left\{ \frac{\dot{m}(Z_i^*, \hat{\boldsymbol{\theta}}) \dot{m}^\text{T}(Z_i^*, \hat{\boldsymbol{\theta}})}{n^2 (\tilde{\pi}_{R\alpha i}^{\text{opt}*})^2} \middle| \mathcal{D}_n, \tilde{\boldsymbol{\theta}}_R^{0*} \right\} \quad (\text{A.43})$$

$$= \frac{1}{n^2} \sum_{i=1}^n \frac{\dot{m}(Z_i, \hat{\boldsymbol{\theta}}) \dot{m}^\text{T}(Z_i, \hat{\boldsymbol{\theta}})}{\tilde{\pi}_{R\alpha i}^{\text{opt}*}} = \Lambda_R^\alpha(\tilde{\boldsymbol{\theta}}_R^{0*}). \quad (\text{A.44})$$

Meanwhile, for every  $\varepsilon > 0$  and some  $\delta \in (0, 2]$ ,

$$\begin{aligned} &\frac{1}{s} \sum_{i=1}^s \mathbb{E} \left\{ \|\boldsymbol{\eta}_i^{\tilde{\boldsymbol{\theta}}_R^{0*}}\|^2 I(\|\boldsymbol{\eta}_i^{\tilde{\boldsymbol{\theta}}_R^{0*}}\| > s^{1/2} \varepsilon) \middle| \mathcal{D}_n, \tilde{\boldsymbol{\theta}}_R^{0*} \right\} \\ &\leq \frac{1}{s^{1+\delta/2} \varepsilon^\delta} \sum_{i=1}^s \mathbb{E} \left\{ \|\boldsymbol{\eta}_i^{\tilde{\boldsymbol{\theta}}_R^{0*}}\|^{2+\delta} I(\|\boldsymbol{\eta}_i^{\tilde{\boldsymbol{\theta}}_R^{0*}}\| > s^{1/2} \varepsilon) \middle| \mathcal{D}_n, \tilde{\boldsymbol{\theta}}_R^{0*} \right\} \\ &\leq \frac{1}{s^{1+\delta/2} \varepsilon^\delta} \sum_{i=1}^s \mathbb{E} \left( \|\boldsymbol{\eta}_i^{\tilde{\boldsymbol{\theta}}_R^{0*}}\|^{2+\delta} \middle| \mathcal{D}_n, \tilde{\boldsymbol{\theta}}_R^{0*} \right) \end{aligned}$$

$$\begin{aligned}
 &\leq \frac{1}{s^{\delta/2} n^{2+\delta} \varepsilon^\delta} \sum_{i=1}^n \frac{\|\dot{m}(Z_i, \hat{\boldsymbol{\theta}})\|^{2+\delta}}{(\tilde{\pi}_{R\alpha}^{\text{opt}*})^{1+\delta}} \\
 &\leq \frac{1}{s^{\delta/2} \alpha^{1+\delta} \varepsilon^\delta} \frac{1}{n} \sum_{i=1}^n \|\dot{m}(Z_i, \hat{\boldsymbol{\theta}})\|^{2+\delta} = O_P(s^{-\delta/2}) = o_P(1).
 \end{aligned}$$

where the second last equality is from Assumption 4. This show that Lindeberg's condition is satisfied in probability. From (A.41), (A.42) and (A.44), by the Lindeberg-Feller central limit theorem (Proposition 2.27 of van der Vaart (1998)), conditional on  $\mathcal{D}_n, \tilde{\boldsymbol{\theta}}_R^{0*}$ , we obtain (A.40).  $\square$

*Proof of Theorem 5.* By direct calculation, we have

$$\begin{aligned}
 \mathbb{E} \left\{ M_{R\alpha}^*(\boldsymbol{\theta}) \middle| \mathcal{D}_n, \tilde{\boldsymbol{\theta}}_R^{0*} \right\} &= M_n(\boldsymbol{\theta}), \\
 \mathbb{V} \left\{ M_{R\alpha}^*(\boldsymbol{\theta}) \middle| \mathcal{D}_n, \tilde{\boldsymbol{\theta}}_R^{0*} \right\} &\leq \frac{1}{sn^2} \sum_{i=1}^n \frac{m^2(Z_i, \boldsymbol{\theta})}{\tilde{\pi}_{R\alpha}^{\text{opt}*}} \leq \frac{1}{sn} \sum_{i=1}^n \frac{m^2(Z_i, \boldsymbol{\theta})}{\alpha} = O_P(s^{-1}).
 \end{aligned}$$

By Chebyshev's inequality, for each  $\boldsymbol{\theta}$ , we have

$$M_{R\alpha}^*(\boldsymbol{\theta}) - M_n(\boldsymbol{\theta}) = o_{P|\mathcal{D}_n, \tilde{\boldsymbol{\theta}}_R^{0*}}(1).$$

Under Assumptions 1 and 2, the parameter space is compact and  $\hat{\boldsymbol{\theta}}$  is the unique global maximum of the continuous concave function  $M_n(\boldsymbol{\theta})$ . Thus from Theorem 5.9 and its remark of van der Vaart (1998), conditionally on  $\mathcal{D}_n$  and  $\tilde{\boldsymbol{\theta}}_R^{0*}$ ,

$$\|\tilde{\boldsymbol{\theta}}_R^\alpha - \hat{\boldsymbol{\theta}}\| = o_P(1).$$

By Taylor expansion

$$0 = \dot{M}_{R\alpha}^*(\tilde{\boldsymbol{\theta}}_R^\alpha) = \dot{M}_{R\alpha}^*(\hat{\boldsymbol{\theta}}) + B_s^{\tilde{\boldsymbol{\theta}}_R^{0*}}(\tilde{\boldsymbol{\theta}}_R^\alpha - \hat{\boldsymbol{\theta}}),$$

so

$$\tilde{\boldsymbol{\theta}}_R^\alpha - \hat{\boldsymbol{\theta}} = - \left( B_s^{\tilde{\boldsymbol{\theta}}_R^{0*}} \right)^{-1} \dot{M}_{R\alpha}^*(\hat{\boldsymbol{\theta}}) = - \frac{1}{\sqrt{s}} \left( B_s^{\tilde{\boldsymbol{\theta}}_R^{0*}} \right)^{-1} \{ \Lambda_R^\alpha(\tilde{\boldsymbol{\theta}}_R^{0*}) \}^{1/2} \sqrt{s} \{ \Lambda_R^\alpha(\tilde{\boldsymbol{\theta}}_R^{0*}) \}^{-1/2} \dot{M}_{R\alpha}^*(\hat{\boldsymbol{\theta}}).$$

Therefore, from Lemma 5 and Lemma 6, conditional on  $\mathcal{D}_n, \tilde{\boldsymbol{\theta}}_R^{0*}$ , by Slutsky's theorem

$$\sqrt{s} \{ \Lambda_R^\alpha(\tilde{\boldsymbol{\theta}}_R^{0*}) \}^{-1/2} \ddot{M}_n(\hat{\boldsymbol{\theta}}) (\tilde{\boldsymbol{\theta}}_R^\alpha - \hat{\boldsymbol{\theta}}) \rightarrow \mathbb{N}(\mathbf{0}, \mathbf{I}), \quad (\text{A.45})$$

in conditional distribution.

Next, we check the distance between  $\Lambda_R^\alpha(\tilde{\boldsymbol{\theta}}_R^{0*})$  and  $\Lambda_R^\alpha(\hat{\boldsymbol{\theta}})$ .

$$\begin{aligned}
 &\| \Lambda_R^\alpha(\tilde{\boldsymbol{\theta}}_R^{0*}) - \Lambda_R^\alpha(\hat{\boldsymbol{\theta}}) \| \\
 &= \left\| \frac{1}{n^2} \sum_{i=1}^n \frac{\dot{m}(Z_i, \hat{\boldsymbol{\theta}}) \dot{m}^\top(Z_i, \hat{\boldsymbol{\theta}})}{(1-\alpha)\pi_{Ri}^{\text{opt}}(\tilde{\boldsymbol{\theta}}_R^{0*}) + \alpha \frac{1}{n}} - \frac{1}{n^2} \sum_{i=1}^n \frac{\dot{m}(Z_i, \hat{\boldsymbol{\theta}}) \dot{m}^\top(Z_i, \hat{\boldsymbol{\theta}})}{(1-\alpha)\pi_{Ri}^{\text{opt}}(\hat{\boldsymbol{\theta}}) + \alpha \frac{1}{n}} \right\| \\
 &\leq \frac{1}{n^2} \sum_{i=1}^n \|\dot{m}(Z_i, \hat{\boldsymbol{\theta}})\|^2 \left| \frac{1}{(1-\alpha)\pi_{Ri}^{\text{opt}}(\tilde{\boldsymbol{\theta}}_R^{0*}) + \alpha \frac{1}{n}} - \frac{1}{(1-\alpha)\pi_{Ri}^{\text{opt}}(\hat{\boldsymbol{\theta}}) + \alpha \frac{1}{n}} \right| \\
 &< \frac{1}{\alpha^2} \sum_{i=1}^n \|\dot{m}(Z_i, \hat{\boldsymbol{\theta}})\|^2 \left| \pi_{Ri}^{\text{opt}}(\tilde{\boldsymbol{\theta}}_R^{0*}) - \pi_{Ri}^{\text{opt}}(\hat{\boldsymbol{\theta}}) \right| \\
 &\leq \frac{1}{\alpha^2} \sum_{i=1}^n \|\dot{m}(Z_i, \hat{\boldsymbol{\theta}})\|^2 \left\{ \frac{\|\dot{m}(Z_i, \tilde{\boldsymbol{\theta}}_R^{0*})\| - \|\dot{m}(Z_i, \hat{\boldsymbol{\theta}})\|}{\sum_{j=1}^n \|\dot{m}(Z_j, \tilde{\boldsymbol{\theta}}_R^{0*})\|} \right\}
 \end{aligned}$$

$$\begin{aligned}
& + \|\dot{m}(Z_i, \hat{\theta})\| \left. \frac{\sum_{j=1}^n \left| \|\dot{m}(Z_j, \tilde{\theta}_R^{0*})\| - \|\dot{m}(Z_j, \hat{\theta})\| \right|}{\sum_{j=1}^n \|\dot{m}(Z_j, \hat{\theta})\| \sum_{j=1}^n \|\dot{m}(Z_j, \tilde{\theta}_R^{0*})\|} \right\} \\
& \equiv \frac{1}{\alpha^2} \sum_{i=1}^n \|\dot{m}(Z_i, \hat{\theta})\|^2 (\Delta_{1i} + \Delta_{2i}). \tag{A.46}
\end{aligned}$$

Under Assumption 3, for any  $j = 1, 2, \dots, n$

$$\begin{aligned}
& \left| \|\dot{m}(Z_j, \hat{\theta})\| - \|\dot{m}(Z_j, \tilde{\theta}_R^{0*})\| \right| \leq \|\dot{m}(Z_j, \hat{\theta}) - \dot{m}(Z_j, \tilde{\theta}_R^{0*})\| \\
& \leq \sqrt{\sum_{k=1}^d \{\dot{m}_k(Z_j, \hat{\theta}) - \dot{m}_k(Z_j, \tilde{\theta}_R^{0*})\}^2} \leq \sum_{k=1}^d \left| \dot{m}_k(Z_j, \hat{\theta}) - \dot{m}_k(Z_j, \tilde{\theta}_R^{0*}) \right| \\
& \leq \sum_{k=1}^d \left| \ddot{m}_k^T(Z_j, \xi_k)(\hat{\theta} - \tilde{\theta}_R^{0*}) \right| \leq \|\hat{\theta} - \tilde{\theta}_R^{0*}\| \sum_{k=1}^d \|\ddot{m}_k(Z_j, \xi_k)\| \equiv \|\hat{\theta} - \tilde{\theta}_R^{0*}\| h(Z_j), \tag{A.47}
\end{aligned}$$

where  $\dot{m}_k(Z_j, \hat{\theta})$  is the  $k$ th element of  $\dot{m}(Z_j, \hat{\theta})$ ,  $\ddot{m}_k(Z_j, \hat{\theta})$  is the  $k$ th column of  $\ddot{m}(Z_j, \hat{\theta})$ , and all  $\xi_k$  are between  $\hat{\theta}$  and  $\tilde{\theta}_R^{0*}$ . Thus,

$$\Delta_{1i} \leq \frac{\|\hat{\theta} - \tilde{\theta}_R^{0*}\| h(Z_i)}{\sum_{j=1}^n \|\dot{m}(Z_j, \tilde{\theta}_R^{0*})\|}, \tag{A.48}$$

and

$$\Delta_{2i} \leq \frac{\|\dot{m}(Z_i, \hat{\theta})\| \|\hat{\theta} - \tilde{\theta}_R^{0*}\| \sum_{j=1}^n h(Z_j)}{\sum_{j=1}^n \|\dot{m}(Z_j, \hat{\theta})\| \sum_{j=1}^n \|\dot{m}(Z_j, \tilde{\theta}_R^{0*})\|} \tag{A.49}$$

From (A.2) and Assumption 3

$$\begin{aligned}
& \frac{1}{n} \sum_{j=1}^n h^2(Z_j) \leq d \frac{1}{n} \sum_{j=1}^n \sum_{k=1}^d \|\ddot{m}_k(Z_j, \xi_k)\|^2 = d \frac{1}{n} \sum_{j=1}^n \sum_{k=1}^d \sum_{l=1}^d \ddot{m}_{k,l}^2(Z_j, \xi_k) \\
& \leq d \frac{1}{n} \sum_{j=1}^n \sum_{k=1}^d \sum_{l=1}^d \left( 2\ddot{m}_{k,l}^2(Z_j, \hat{\theta}) + 2\psi^2(Z_j) \|\tilde{\theta}_R^{0*} - \hat{\theta}\|^2 \right) = O_P(1) \tag{A.50}
\end{aligned}$$

which also implies that  $\frac{1}{n} \sum_{j=1}^n h(Z_j) = O_P(1)$ . Thus,

$$\begin{aligned}
& \sum_{i=1}^n \|\dot{m}(Z_i, \hat{\theta})\| \Delta_{1i} \leq \frac{O_P(\|\hat{\theta} - \tilde{\theta}_R^{0*}\|)}{n} \sum_{i=1}^n \|\dot{m}(Z_i, \hat{\theta})\|^2 h(Z_i) \\
& \leq O_P(\|\hat{\theta} - \tilde{\theta}_R^{0*}\|) \left\{ \frac{1}{n} \sum_{i=1}^n \|\dot{m}(Z_i, \hat{\theta})\|^4 \right\}^{\frac{1}{2}} \left\{ \frac{1}{n} \sum_{i=1}^n h^2(Z_i) \right\}^{\frac{1}{2}}, \tag{A.51}
\end{aligned}$$

and

$$\sum_{i=1}^n \|\dot{m}(Z_i, \hat{\theta})\| \Delta_{2i} = O_P(\|\hat{\theta} - \tilde{\theta}_R^{0*}\|) \frac{1}{n} \sum_{i=1}^n \|\dot{m}(Z_i, \hat{\theta})\|^2 \tag{A.52}$$

Combining (A.46), (A.51), and (A.52), we obtain that for large  $s_0$ ,  $s$  and  $n$ ,

$$\|\Lambda_R^\alpha(\tilde{\theta}_R^{0*}) - \Lambda_R^\alpha(\hat{\theta})\| = \|\hat{\theta} - \tilde{\theta}_R^{0*}\| O_P(1) = o_P(1).$$

Thus, Slutsky's theorem and (A.45) indicate that given  $\mathcal{D}_n$  and  $\tilde{\boldsymbol{\theta}}_R^{0*}$ , as  $s_0, s$  and  $n \rightarrow \infty$

$$\sqrt{s}\{V_R^\alpha(\hat{\boldsymbol{\theta}})\}^{-1/2}(\tilde{\boldsymbol{\theta}}_R^\alpha - \hat{\boldsymbol{\theta}}) \rightarrow \mathbb{N}(\mathbf{0}, \mathbf{I}),$$

in conditional distribution. From similar arguments used in the proof of Theorem 1, we know that the convergence also holds in unconditional distribution, and this finishes the proof.  $\square$

### A.1.6 Proof of Theorem 6

To prove Theorem 6, we begin with Lemmas 7, 8 and 9.

**Lemma 7.** *Under Assumptions 4, conditional on  $\mathcal{D}_n$  and  $\tilde{\boldsymbol{\theta}}_R^{0*}$ , then*

$$\sqrt{s}\{\Lambda_P^\alpha(\tilde{\boldsymbol{\theta}}_P^{0*})\}^{-1/2}\dot{M}_{P\alpha}^*(\hat{\boldsymbol{\theta}}) \rightarrow \mathbb{N}(\mathbf{0}, \mathbf{I}),$$

in conditional distribution, where

$$\Lambda_P^\alpha(\tilde{\boldsymbol{\theta}}_P^{0*}) = \frac{s}{n^2} \sum_{i=1}^n \frac{\{1 - (s\tilde{\pi}_{P\alpha i}^{\text{opt}}) \wedge 1\} \dot{m}(Z_i, \hat{\boldsymbol{\theta}}) \dot{m}^\top(Z_i, \hat{\boldsymbol{\theta}})}{(s\tilde{\pi}_{P\alpha i}^{\text{opt}}) \wedge 1}.$$

*Proof.* Here, for writing convenience, we redefined the notation  $\nu_i = I(u_i \leq s\pi_{P\alpha i}^{\text{opt}})$  and let

$$\sqrt{s}\dot{M}_{P\alpha}^*(\hat{\boldsymbol{\theta}}) = \sum_{i=1}^n \frac{\nu_i \sqrt{s} \dot{m}(Z_i, \hat{\boldsymbol{\theta}})}{n\{(s\tilde{\pi}_{P\alpha i}^{\text{opt}}) \wedge 1\}} \equiv \sum_{i=1}^n \boldsymbol{\eta}_i^{\tilde{\boldsymbol{\theta}}_P^{0*}}. \quad (\text{A.53})$$

From direct calculation and the definition of  $\hat{\boldsymbol{\theta}}$ , we have

$$\mathbb{E}\left(\sqrt{s}\dot{M}_{P\alpha}^*(\hat{\boldsymbol{\theta}}) \mid \mathcal{D}_n, \tilde{\boldsymbol{\theta}}_P^{0*}\right) = \frac{\sqrt{s}}{n} \sum_{i=1}^n \dot{m}(Z_i, \hat{\boldsymbol{\theta}}) = \mathbf{0},$$

and

$$\begin{aligned} \mathbb{V}\left(\sqrt{s}\dot{M}_{P\alpha}^*(\hat{\boldsymbol{\theta}}) \mid \mathcal{D}_n, \tilde{\boldsymbol{\theta}}_P^{0*}\right) &= \frac{s}{n^2} \sum_{i=1}^n \frac{\mathbb{V}(\nu_i \mid \mathcal{D}_n, \tilde{\boldsymbol{\theta}}_P^{0*}) \dot{m}(Z_i, \hat{\boldsymbol{\theta}}) \dot{m}^\top(Z_i, \hat{\boldsymbol{\theta}})}{\{(s\tilde{\pi}_{P\alpha i}^{\text{opt}}) \wedge 1\}^2} \\ &= \frac{s}{n^2} \sum_{i=1}^n \frac{\{1 - (s\tilde{\pi}_{P\alpha i}^{\text{opt}}) \wedge 1\} \dot{m}(Z_i, \hat{\boldsymbol{\theta}}) \dot{m}^\top(Z_i, \hat{\boldsymbol{\theta}})}{(s\tilde{\pi}_{P\alpha i}^{\text{opt}}) \wedge 1} \\ &\leq \frac{1}{\alpha n} \sum_{i=1}^n \dot{m}(Z_i, \hat{\boldsymbol{\theta}}) \dot{m}^\top(Z_i, \hat{\boldsymbol{\theta}}) = O_P(1). \end{aligned}$$

Next, we check Lindeberg's condition. For any  $\epsilonpsilon > 0$  and  $\rho \in (0, 2]$ ,

$$\begin{aligned} &\mathbb{E}\left\{\sum_{i=1}^n \|\boldsymbol{\eta}_i^{\tilde{\boldsymbol{\theta}}_P^{0*}}\| I(\|\boldsymbol{\eta}_i^{\tilde{\boldsymbol{\theta}}_P^{0*}}\| > \epsilon) \mid \mathcal{D}_n, \tilde{\boldsymbol{\theta}}_P^{0*}\right\} \\ &\leq \frac{1}{\epsilon^\rho} \sum_{i=1}^n \mathbb{E}\left\{\|\boldsymbol{\eta}_i^{\tilde{\boldsymbol{\theta}}_P^{0*}}\|^{2+\rho} I(\|\boldsymbol{\eta}_i^{\tilde{\boldsymbol{\theta}}_P^{0*}}\| > \epsilon) \mid \mathcal{D}_n, \tilde{\boldsymbol{\theta}}_P^{0*}\right\} \\ &\leq \frac{1}{\epsilon^\rho} \sum_{i=1}^n \mathbb{E}\left(\|\boldsymbol{\eta}_i^{\tilde{\boldsymbol{\theta}}_P^{0*}}\|^{2+\rho} \mid \mathcal{D}_n, \tilde{\boldsymbol{\theta}}_P^{0*}\right) = \frac{s^{1+\rho/2}}{\epsilon^\rho n^{2+\rho}} \sum_{i=1}^n \frac{\|\dot{m}(Z_i, \hat{\boldsymbol{\theta}})\|^{2+\rho}}{\{(s\tilde{\pi}_{P\alpha i}^{\text{opt}}) \wedge 1\}^{1+\rho}} \\ &\leq \frac{s^{1+\rho/2}}{\epsilon^\rho n^{2+\rho}} \sum_{i=1}^n \frac{\|\dot{m}(Z_i, \hat{\boldsymbol{\theta}})\|^{2+\rho}}{(s\alpha/n)^{1+\rho}} = \frac{1}{\alpha^{1+\rho} \epsilon^\rho s^{\rho/2}} \frac{1}{n} \sum_{i=1}^n \|\dot{m}(Z_i, \hat{\boldsymbol{\theta}})\|^{2+\rho} = O_P(s^{-\rho/2}). \end{aligned}$$

Thus, from the Lindeberg-Feller Central Limit Theorem (cf. van der Vaart, 1998), Lemma 7 follows.  $\square$

**Lemma 8.** Under Assumption 3, for any  $\mathbf{u}_s = o_P(1)$ , conditional on  $\mathcal{D}_n$  and  $\tilde{\boldsymbol{\theta}}_P^{0*}$ ,

$$\frac{1}{n} \sum_{i=1}^n \frac{\nu_i \ddot{m}(Z_i, \hat{\boldsymbol{\theta}} + \mathbf{u}_s)}{(s\tilde{\pi}_{P\alpha i}^{\text{opt}}) \wedge 1} - \frac{1}{n} \sum_{i=1}^n \ddot{m}(Z_i, \hat{\boldsymbol{\theta}}) = o_P(1).$$

*Proof.* First, using an approach similar to prove (A.14), we can show that given  $\mathcal{D}_n$  and  $\tilde{\boldsymbol{\theta}}_P^{0*}$ ,

$$\frac{1}{n} \sum_{i=1}^n \frac{\nu_i \psi(Z_i)}{(s\tilde{\pi}_{P\alpha i}^{\text{opt}}) \wedge 1} = O_P(1). \quad (\text{A.54})$$

For every  $k, l = 1, 2, \dots, d$ , from Lipschitz continuity, we have

$$\left| \frac{1}{n} \sum_{i=1}^n \frac{\nu_i \ddot{m}_{k,l}(Z_i, \hat{\boldsymbol{\theta}} + \mathbf{u}_s)}{(s\tilde{\pi}_{P\alpha i}^{\text{opt}}) \wedge 1} - \frac{1}{n} \sum_{i=1}^n \frac{\nu_i \ddot{m}_{k,l}(Z_i, \hat{\boldsymbol{\theta}})}{(s\tilde{\pi}_{P\alpha i}^{\text{opt}}) \wedge 1} \right| \leq \frac{1}{n} \sum_{i=1}^n \frac{\nu_i \psi(Z_i) \|\mathbf{u}_s\|}{(s\tilde{\pi}_{P\alpha i}^{\text{opt}}) \wedge 1} = o_P(1). \quad (\text{A.55})$$

For each  $k, l = 1, 2, \dots, d$ , direct calculations show that

$$\begin{aligned} \mathbb{E} \left\{ \frac{1}{n} \sum_{i=1}^n \frac{\nu_i \ddot{m}_{k,l}(Z_i, \hat{\boldsymbol{\theta}})}{(s\tilde{\pi}_{P\alpha i}^{\text{opt}}) \wedge 1} \middle| \mathcal{D}_n, \tilde{\boldsymbol{\theta}}_P^{0*} \right\} &= \frac{1}{n} \sum_{i=1}^n \ddot{m}_{k,l}(Z_i, \hat{\boldsymbol{\theta}}), \\ \mathbb{V} \left\{ \frac{1}{n} \sum_{i=1}^n \frac{\nu_i \ddot{m}_{k,l}(Z_i, \hat{\boldsymbol{\theta}})}{(s\tilde{\pi}_{P\alpha i}^{\text{opt}}) \wedge 1} \middle| \mathcal{D}_n, \tilde{\boldsymbol{\theta}}_P^{0*} \right\} &\leq \frac{1}{sn^2} \sum_{i=1}^n \frac{\ddot{m}_{k,l}^2(Z_i, \hat{\boldsymbol{\theta}})}{(s\tilde{\pi}_{P\alpha i}^{\text{opt}}) \wedge 1} \leq \frac{1}{\alpha sn} \sum_{i=1}^n h^2(Z_i) = O_P(s^{-1}). \end{aligned}$$

According to Chebyshev's inequality, we obtain

$$\frac{1}{n} \sum_{i=1}^n \frac{\nu_i \ddot{m}(Z_i, \hat{\boldsymbol{\theta}})}{(s\tilde{\pi}_{P\alpha i}^{\text{opt}}) \wedge 1} - \frac{1}{n} \sum_{i=1}^n \ddot{m}(Z_i, \hat{\boldsymbol{\theta}}) = O_P(s^{-1/2}). \quad (\text{A.56})$$

Therefore, combining (A.55) and (A.56), we have

$$\frac{1}{n} \sum_{i=1}^n \frac{\nu_i \ddot{m}(Z_i, \hat{\boldsymbol{\theta}} + \mathbf{u}_s)}{s\tilde{\pi}_{P\alpha i}^{\text{opt}}} - \frac{1}{n} \sum_{i=1}^n \ddot{m}(Z_i, \hat{\boldsymbol{\theta}}) = o_P(1).$$

□

**Lemma 9.** Under Assumptions 3 and 4,

- 1) if  $\varrho_n = s/(bn) \rightarrow \varrho \in (0, 1)$ , then  $H^{0*} - H_{\varrho_n} = o_P(1)$ ;
- 2)  $\Psi^{0*} - \Psi_{\varrho_n} = o_P(1)$ , where

$$\Psi_{\varrho_n} = \frac{1}{n} \sum_{i=1}^n \{ \|\dot{m}(Z_i, \hat{\boldsymbol{\theta}})\| \wedge H_{\varrho_n} \}; \quad (\text{A.57})$$

- 3) if  $s/(bn) \rightarrow \varrho = 0$ , then  $\Psi^{0*} - \Psi_{\infty} = o_P(1)$ .

*Proof.* Note that  $H^{0*}$  is the  $\lceil s_0^* - s_0^*s/b/n \rceil$ -th order statistics of  $\|\dot{m}(Z_i^{0*}, \tilde{\boldsymbol{\theta}}_P^{0*})\|$ ,  $i = 1, \dots, s_0^*$ . For any  $\rho > 0$ , let  $\tilde{H}_\rho$  be the  $\lceil n(1-\rho) \rceil$ -th order statistics of  $\|\dot{m}(Z_1, \tilde{\boldsymbol{\theta}}_P^{0*})\|, \dots, \|\dot{m}(Z_n, \tilde{\boldsymbol{\theta}}_P^{0*})\|$ . Let  $\nu_{(i)}^0 = 1$  if  $\|\dot{m}(Z, \tilde{\boldsymbol{\theta}}_P^{0*})\|_{(i)}$  is included in  $\|\dot{m}(Z_1^*, \tilde{\boldsymbol{\theta}}_P^{0*})\|, \dots, \|\dot{m}(Z_{s_0^*}^*, \tilde{\boldsymbol{\theta}}_P^{0*})\|$ . For any  $\varrho_+ > 0$ ,

$$\mathbb{P}(H^{0*} \leq \tilde{H}_{\varrho_+}) = \mathbb{P} \left( \sum_{i=1}^{\lceil n(1-\varrho_+) \rceil} \nu_{(i)}^0 \geq \lceil s_0^* - s_0^*s/b/n \rceil \right). \quad (\text{A.58})$$

Note that

$$\frac{1}{s_0} \sum_{i=1}^{\lceil n(1-\varrho_+) \rceil} \nu_{(i)}^0 = 1 - \varrho_+ + o_P(1) \quad \text{and} \quad \frac{\lceil s_0^* - s_0^*s/b/n \rceil}{s_0} = 1 - \varrho + o_P(1). \quad (\text{A.59})$$

Thus,

$$\mathbb{P}(H^{0*} \leq \tilde{H}_{\varrho_+}) \rightarrow 0. \quad (\text{A.60})$$

Similarly, we obtain that for any  $\varrho_- < \varrho$ ,

$$\mathbb{P}(H^{0*} \leq \tilde{H}_{\varrho_-}) \rightarrow 1. \quad (\text{A.61})$$

Note that  $\tilde{H}_{\varrho_+}$  is between the  $\lceil n(1 - \varrho_+) \rceil - s_0^*$ -th and the  $\lceil n(1 - \varrho_+) \rceil$ -th order statistics of  $\|\dot{m}(Z_i, \tilde{\theta}_P^{0*})\|$ 's that are not included in  $\|\dot{m}(Z_1^{0*}, \tilde{\theta}_P^{0*})\|, \dots, \|\dot{m}(Z_{s_0^*}^{0*}, \tilde{\theta}_P^{0*})\|$ . The joint distribution of these  $\|\dot{m}(Z_i, \tilde{\theta}_P^{0*})\|$ 's are exchangeable, and  $s_0^*/n \rightarrow 0$  in probability. Therefore, both the  $\lceil n(1 - \varrho_+) \rceil - s_0^*$ -th and the  $\lceil n(1 - \varrho_+) \rceil$ -th order statistics of these  $\|\dot{m}(Z_i, \tilde{\theta}_P^{0*})\|$ 's converge to the  $\varrho_+$ -quantile of the distribution of  $\|\dot{m}(Z_i, \theta_0)\|$  in probability (Chanda, 1971), where  $\theta_0 = \arg \max_{\theta} \mathbb{E}\{m(Z, \theta)\}$ . As a result,  $\tilde{H}_{\varrho_+}$  converge in probability to the  $\varrho_+$ -quantile of the distribution of  $\|\dot{m}(Z, \theta_0)\|$ , say  $\zeta_{\varrho_+}$ . Similarly,  $\tilde{H}_{\varrho_-}$  converge in probability to the  $\varrho_-$ -quantile of the distribution of  $\|\dot{m}(Z, \theta_0)\|$ , say  $\zeta_{\varrho_-}$ . Thus, (A.60) and (A.61) together imply that for any  $\epsilon > 0$ ,

$$\mathbb{P}(\zeta_{\varrho_+} - \epsilon < H^{0*} < \zeta_{\varrho_-} + \epsilon) \rightarrow 1. \quad (\text{A.62})$$

Since the distribution of  $Z$  is continuous and so is that of  $\|\dot{m}(Z, \theta_0)\|$ , we can choose  $\varrho_+$  and  $\varrho_-$  close to  $\varrho$  enough such that  $\zeta_{\varrho_-} - \zeta_{\varrho} < \epsilon$  and  $\zeta_{\varrho} - \zeta_{\varrho_+} < \epsilon$ , which implies that

$$\mathbb{P}(\zeta_{\varrho} - 2\epsilon < H^{0*} < \zeta_{\varrho} + 2\epsilon) \rightarrow 1, \quad (\text{A.63})$$

for any  $\epsilon$ . Thus,  $H^{0*} = \zeta_{\varrho} + o_P(1)$ . Since  $\|\dot{m}(Z_1, \hat{\theta})\|, \dots, \|\dot{m}(Z_n, \hat{\theta})\|$  are exchangeable,  $H_{\varrho_n} = \zeta_{\varrho} + o_P(1)$ , where  $H_{\varrho_n}$  is the  $\lceil n(1 - \varrho_n) \rceil$ -th order statistics of  $\|\dot{m}(Z_1, \hat{\theta})\|, \dots, \|\dot{m}(Z_n, \hat{\theta})\|$ . Therefore,  $H^{0*} - H_{\varrho_n} = o_P(1)$ .

Now we prove 2) of Lemma 9. If  $\varrho = 0$  and  $\|\dot{m}(Z, \theta)\|$  is bounded, then

$$\Psi^{0*} = \sum_{i=1}^{\lceil s_0^* - s_0^*s/b/n \rceil} \frac{\|\dot{m}(Z_i^{0*}, \tilde{\theta}_P^{0*})\|_{(i)}}{s_0^*} + \frac{s_0^* - \lceil s_0^* - s_0^*s/b/n \rceil}{s_0^*} H^{0*} = \sum_{i=1}^{s_0^*} \frac{\|\dot{m}(Z_i^{0*}, \tilde{\theta}_P^{0*})\|}{s_0^*} + o_P(1),$$

and similarly,

$$\Psi_{\varrho_n} = \frac{1}{n} \sum_{i=1}^n \|\dot{m}(Z_i, \hat{\theta})\| + o_P(1).$$

Thus the proof reduce to prove that

$$\sum_{i=1}^{s_0^*} \frac{\|\dot{m}(Z_i^{0*}, \tilde{\theta}_P^{0*})\|}{s_0^*} = \frac{1}{n} \sum_{i=1}^n \|\dot{m}(Z_i, \hat{\theta})\| + o_P(1),$$

which can be proved by Taylor's expansion and Markov's inequality. To prove other cases, let  $\nu_i^0 = 1$  if the  $i$ -th observation is included in the pilot subsample and  $\nu_i^0 = 0$  otherwise; then  $\Psi^{0*}$  can be written as

$$\Psi^{0*} = \frac{1}{s_0^*} \sum_{i=1}^n \nu_i^0 \{\|\dot{m}(Z_i, \tilde{\theta}_P^{0*})\| \wedge H^{0*}\}.$$

Define

$$\Psi_{H_{\varrho_n}}^{0*} = \frac{1}{s_0^*} \sum_{i=1}^n \nu_i^0 \{\|\dot{m}(Z_i, \tilde{\theta}_P^{0*})\| \wedge H_{\varrho_n}\} \quad \text{and} \quad \Psi_{\hat{\theta}}^{0*} = \frac{1}{s_0^*} \sum_{i=1}^n \nu_i^0 \{\|\dot{m}(Z_i, \hat{\theta})\| \wedge H_{\varrho_n}\}.$$

If  $\varrho > 0$ , then

$$\begin{aligned} |\Psi^{0*} - \Psi_{H_{\varrho_n}}^{0*}| &= \frac{1}{s_0^*} \sum_{i=1}^n \nu_i^0 \left| \|\dot{m}(Z_i, \tilde{\theta}_P^{0*})\| \wedge H^{0*} - \|\dot{m}(Z_i, \tilde{\theta}_P^{0*})\| \wedge H_{\varrho_n} \right| \\ &\leq \frac{|H^{0*} - H_{\varrho_n}|}{s_0^*} \sum_{i=1}^n \nu_i^0 I \left\{ \|\dot{m}(Z_i, \tilde{\theta}_P^{0*})\| \geq H^{0*} \wedge H_{\varrho_n} \right\} \leq |H^{0*} - H_{\varrho_n}| = o_P(1). \end{aligned}$$

If  $\varrho = 0$  and  $\|\dot{m}(Z, \theta)\|$  is unbounded, then  $H^{0*} \wedge H_{\varrho_n} \rightarrow \infty$  in probability. Under Assumptions 3 and 4, it can be shown that  $\frac{1}{s_0^*} \sum_{i=1}^n \nu_i^0 \|\dot{m}(Z_i, \tilde{\theta}_P^{0*})\|^2 = O_{P|\mathcal{D}_n}(1)$ . Thus,

$$\begin{aligned} |\Psi^{0*} - \Psi_{H_{\varrho_n}}^{0*}| &\leq \frac{1}{s_0^*} \sum_{i=1}^n \nu_i^0 \|\dot{m}(Z_i, \tilde{\theta}_P^{0*})\| I \left\{ \|\dot{m}(Z_i, \tilde{\theta}_P^{0*})\| \geq H^{0*} \wedge H_{\varrho_n} \right\} \\ &\quad + \frac{H^{0*}}{s_0^*} \sum_{i=1}^n \nu_i^0 I \left\{ \|\dot{m}(Z_i, \tilde{\theta}_P^{0*})\| \geq H^{0*} \right\} + \frac{H_{\varrho_n}}{s_0^*} \sum_{i=1}^n \nu_i^0 I \left\{ \|\dot{m}(Z_i, \tilde{\theta}_P^{0*})\| \geq H_{\varrho_n} \right\} \\ &\leq \left\{ \frac{1}{H^{0*} \wedge H_{\varrho_n}} + \frac{1}{H^{0*}} + \frac{1}{H_{\varrho_n}} \right\} \frac{1}{s_0^*} \sum_{i=1}^n \nu_i^0 \|\dot{m}(Z_i, \tilde{\theta}_P^{0*})\|^2 = o_P(1). \end{aligned} \tag{A.64}$$

Furthermore, we can show that

$$\begin{aligned} |\Psi_{H_{\varrho_n}}^{0*} - \Psi_{\hat{\theta}}^{0*}| &\leq \frac{1}{s_0^*} \sum_{i=1}^n \nu_i^0 \{ \|\dot{m}(Z_i, \tilde{\theta}_P^{0*})\| - \|\dot{m}(Z_i, \hat{\theta})\| \} \\ &\leq \frac{\|\hat{\theta} - \tilde{\theta}_P^{0*}\|}{s_0^*} \sum_{i=1}^n \nu_i^0 h(Z_i) = o_P(1) \end{aligned}$$

and

$$|\Psi_{\hat{\theta}}^{0*} - \Psi_{\varrho_n}| = o_P(1),$$

where the last two  $o_P(1)$  are obtained by mean and variance calculations under the conditional distribution of  $\nu_i^0$ 's. Thus, we have that

$$|\Psi^{0*} - \Psi_{\varrho_n}| = o_P(1). \tag{A.65}$$

With 2) of Lemma 9 proved, in order to prove 3), we only need to show that  $\Psi_\infty - \Psi_{\varrho_n} = o_P(1)$  if  $s/(bn) \rightarrow \varrho = 0$ . This is true because if  $\|\dot{m}(Z, \theta)\|$  is bounded, then

$$\begin{aligned} |\Psi_\infty - \Psi_{\varrho_n}| &\leq \frac{1}{n} \sum_{i=1}^n \left| \|\dot{m}(Z_i, \hat{\theta})\| - \|\dot{m}(Z_i, \hat{\theta})\| \wedge H_{\varrho_n} \right| \\ &\leq \frac{n - \lceil n(1 - \varrho_n) \rceil}{n} \|\dot{m}(Z, \hat{\theta})\|_{(n)} = o_P(1); \end{aligned}$$

otherwise,

$$\begin{aligned} |\Psi_\infty - \Psi_{\varrho_n}| &\leq \frac{1}{n} \sum_{i=1}^n \left| \|\dot{m}(Z_i, \hat{\theta})\| - \|\dot{m}(Z_i, \hat{\theta})\| \wedge H_{\varrho_n} \right| \\ &\leq \frac{1}{n} \sum_{i=1}^n \|\dot{m}(Z_i, \hat{\theta})\| I \left\{ \|\dot{m}(Z_i, \hat{\theta})\| \geq H_{\varrho_n} \right\} \\ &\leq \frac{1}{n H_{\varrho_n}} \sum_{i=1}^n \|\dot{m}(Z_i, \hat{\theta})\|^2 = o_P(1). \end{aligned}$$

□

*Proof of Theorem 6.* For Algorithm 2,  $M_{P\alpha}^*(\boldsymbol{\theta})$  can be written as

$$M_{P\alpha}^*(\boldsymbol{\theta}) = \frac{1}{n} \sum_{i=1}^n \frac{\nu_i m(Z_i, \boldsymbol{\theta})}{(s\tilde{\pi}_{P\alpha i}^{\text{opt}}) \wedge 1}.$$

Denote

$$\gamma_{\tilde{\boldsymbol{\theta}}_P^{0*}P}(\mathbf{u}) = sM_{P\alpha}^*(\hat{\boldsymbol{\theta}} + \mathbf{u}/\sqrt{s}) - sM_{P\alpha}^*(\hat{\boldsymbol{\theta}}).$$

Under Assumption 2,  $\sqrt{s}(\tilde{\boldsymbol{\theta}}_P^{0*} - \hat{\boldsymbol{\theta}})$  is the unique maximizer of  $\gamma_{\tilde{\boldsymbol{\theta}}_P^{0*}P}(\mathbf{u})$ . By Taylor's expansion,

$$\gamma_{\tilde{\boldsymbol{\theta}}_P^{0*}P}(\mathbf{u}) = \sqrt{s}\mathbf{u}^T \dot{M}_{P\alpha}^*(\hat{\boldsymbol{\theta}}) + \frac{\mathbf{u}^T \ddot{M}_{P\alpha}^*(\hat{\boldsymbol{\theta}} + \mathbf{u}/\sqrt{s})\mathbf{u}}{2}$$

where  $\mathbf{u}$  lies between  $\mathbf{0}$  and  $\mathbf{u}/\sqrt{s}$ . From Lemma 7,  $\sqrt{s}\dot{M}_{P\alpha}^*(\hat{\boldsymbol{\theta}})$  is stochastically bounded in conditional probability given  $\mathcal{D}_n$  and  $\tilde{\boldsymbol{\theta}}_P^{0*}$ ; from Lemma 8, conditional on  $\mathcal{D}_n$  and  $\tilde{\boldsymbol{\theta}}_P^{0*}$ ,  $\ddot{M}_{P\alpha}^*(\hat{\boldsymbol{\theta}} + \mathbf{u}/\sqrt{s}) - \ddot{M}_n(\hat{\boldsymbol{\theta}}) = o_P(1)$  and  $\ddot{M}_n(\hat{\boldsymbol{\theta}})$  converges to a positive-definite matrix. Thus, from the Basic Corollary in page 2 of Hjort and Pollard Hjort and Pollard (2011), the minimizer of  $s\gamma(\mathbf{u})$ ,  $\sqrt{s}(\tilde{\boldsymbol{\theta}}_P^{0*} - \hat{\boldsymbol{\theta}})$ , satisfies that

$$\sqrt{s}(\tilde{\boldsymbol{\theta}}_P^{0*} - \hat{\boldsymbol{\theta}}) = \ddot{M}_n^{-1}(\hat{\boldsymbol{\theta}})\sqrt{s}\dot{M}_{P\alpha}^*(\hat{\boldsymbol{\theta}}) + o_P(1), \quad (\text{A.66})$$

which implies that

$$\sqrt{s}\{\Lambda_P^\alpha(\tilde{\boldsymbol{\theta}}_P^{0*})\}^{-1/2}\ddot{M}_n(\hat{\boldsymbol{\theta}})(\tilde{\boldsymbol{\theta}}_P^{0*} - \hat{\boldsymbol{\theta}}) \rightarrow \mathbb{N}(\mathbf{0}, \mathbf{I}), \quad (\text{A.67})$$

in conditional distribution given  $\mathcal{D}_n$  and  $\tilde{\boldsymbol{\theta}}_P^{0*}$ .

Next, we will check the distance between  $\Lambda_P^\alpha(\tilde{\boldsymbol{\theta}}_P^{0*})$  and  $\Lambda_P^\alpha(\hat{\boldsymbol{\theta}})$ . Let  $\Lambda_{P\varrho_n}^\alpha(\hat{\boldsymbol{\theta}})$  have the same expression as  $\Lambda_P^\alpha(\hat{\boldsymbol{\theta}})$  in Theorem 6 except that  $\pi_{P_i}^{\text{opt}}(\hat{\boldsymbol{\theta}})$  in the denominator is replaced by

$$\pi_{P\alpha i}^{\varrho_n}(\hat{\boldsymbol{\theta}}) = (1 - \alpha)\pi_{P_i}^{\varrho_n}(\hat{\boldsymbol{\theta}}) + \alpha \frac{1}{n} \quad \text{with} \quad \pi_{P_i}^{\varrho_n} = \frac{\|\dot{m}(Z_i, \hat{\boldsymbol{\theta}})\| \wedge H_{\varrho_n}}{\sum_{j=1}^n \{\|\dot{m}(Z_j, \hat{\boldsymbol{\theta}})\| \wedge H_{\varrho_n}\}}.$$

We have that

$$\begin{aligned} \|\Lambda_P^\alpha(\tilde{\boldsymbol{\theta}}_P^{0*}) - \Lambda_{P\varrho_n}^\alpha(\hat{\boldsymbol{\theta}})\| &\leq \frac{s}{n^2} \sum_{i=1}^n \left| \frac{\|\dot{m}(Z_i, \hat{\boldsymbol{\theta}})\|^2}{\{s\tilde{\pi}_{P\alpha i}^{\text{opt}}(\tilde{\boldsymbol{\theta}}_P^{0*})\} \wedge 1} - \frac{\|\dot{m}(Z_i, \hat{\boldsymbol{\theta}})\|^2}{\{s\pi_{P\alpha i}^{\varrho_n}(\hat{\boldsymbol{\theta}})\} \wedge 1} \right| \\ &= \frac{s}{n^2} \sum_{i=1}^n \|\dot{m}(Z_i, \hat{\boldsymbol{\theta}})\|^2 \left| \frac{1}{\{s\tilde{\pi}_{P\alpha i}^{\text{opt}}(\tilde{\boldsymbol{\theta}}_P^{0*})\} \wedge 1} - \frac{1}{\{s\pi_{P\alpha i}^{\varrho_n}(\hat{\boldsymbol{\theta}})\} \wedge 1} \right| \\ &= \frac{s}{n^2} \sum_{i=1}^n \|\dot{m}(Z_i, \hat{\boldsymbol{\theta}})\|^2 \left| \frac{\{s\tilde{\pi}_{P\alpha i}^{\text{opt}}(\tilde{\boldsymbol{\theta}}_P^{0*})\} \wedge 1 - \{s\pi_{P\alpha i}^{\varrho_n}(\hat{\boldsymbol{\theta}})\} \wedge 1}{[\{s\tilde{\pi}_{P\alpha i}^{\text{opt}}(\tilde{\boldsymbol{\theta}}_P^{0*})\} \wedge 1][\{s\pi_{P\alpha i}^{\varrho_n}(\hat{\boldsymbol{\theta}})\} \wedge 1]} \right| \\ &< \frac{1}{\alpha^2} \sum_{i=1}^n \|\dot{m}(Z_i, \hat{\boldsymbol{\theta}})\|^2 \left| \tilde{\pi}_{P_i}^{\text{opt}}(\tilde{\boldsymbol{\theta}}_P^{0*}) - \pi_{P_i}^{\varrho_n}(\hat{\boldsymbol{\theta}}) \right| \end{aligned} \quad (\text{A.68})$$

If  $\varrho > 0$ , then from

$$\begin{aligned} &n \left| \tilde{\pi}_{P_i}^{\text{opt}}(\tilde{\boldsymbol{\theta}}_P^{0*}) - \pi_{P_i}^{\varrho_n}(\hat{\boldsymbol{\theta}}) \right| \\ &= \left| \frac{\|\dot{m}(Z_i, \tilde{\boldsymbol{\theta}}_P^{0*})\| \wedge H^{0*}}{\Psi_{\varrho_n}^{0*}} - \frac{\|\dot{m}(Z_i, \hat{\boldsymbol{\theta}})\| \wedge H_{\varrho_n}}{\Psi_{\varrho_n}} \right| \\ &\leq \left| \frac{\|\dot{m}(Z_i, \tilde{\boldsymbol{\theta}}_P^{0*})\| \wedge H^{0*} - \|\dot{m}(Z_i, \hat{\boldsymbol{\theta}})\| \wedge H_{\varrho_n}}{\Psi_{\varrho_n}^{0*}} \right| + \left\{ \|\dot{m}(Z_i, \hat{\boldsymbol{\theta}})\| \wedge H_{\varrho_n} \right\} \left| \frac{\Psi_{\varrho_n}^{0*} - \Psi_{\varrho_n}}{\Psi_{\varrho_n}^{0*}\Psi_{\varrho_n}} \right| \\ &\leq \frac{\left| \|\dot{m}(Z_i, \tilde{\boldsymbol{\theta}}_P^{0*})\| - \|\dot{m}(Z_i, \hat{\boldsymbol{\theta}})\| \right|}{\Psi_{\varrho_n}^{0*}} + \frac{|H^{0*} - H_{\varrho_n}|}{\Psi_{\varrho_n}^{0*}} + \left\{ \|\dot{m}(Z_i, \hat{\boldsymbol{\theta}})\| \wedge H_{\varrho_n} \right\} \frac{|\Psi_{\varrho_n}^{0*} - \Psi_{\varrho_n}|}{\Psi_{\varrho_n}^{0*}\Psi_{\varrho_n}}, \end{aligned}$$



we have that

$$\begin{aligned}
& \|\Lambda_P^\alpha(\tilde{\theta}_P^{0*}) - \Lambda_{P_{\ell_n}}^\alpha(\hat{\theta})\| \\
& \leq \frac{1}{\alpha^2} \sum_{i=1}^n \|\dot{m}(Z_i, \hat{\theta})\|^2 \left| \tilde{\pi}_{P_i}^{\text{opt}}(\tilde{\theta}_P^{0*}) - \pi_{P_i}^{\ell_n}(\hat{\theta}) \right| \\
& \leq \frac{1}{\alpha^2 \Psi_{\ell_n}^{0*}} \sum_{i=1}^n \|\dot{m}(Z_i, \hat{\theta})\|^2 \left| \|\dot{m}(Z_i, \tilde{\theta}_P^{0*})\| - \|\dot{m}(Z_i, \hat{\theta})\| \right| \\
& \quad + \frac{|H^{0*} - H_{\ell_n}|}{\alpha^2 \Psi_{\ell_n}^{0*}} \sum_{i=1}^n \|\dot{m}(Z_i, \hat{\theta})\|^2 + \frac{|\Psi_{\ell_n}^{0*} - \Psi_{\ell_n}|}{\alpha^2 \Psi_{\ell_n}^{0*} \Psi_{\ell_n}} \sum_{i=1}^n \|\dot{m}(Z_i, \hat{\theta})\|^3 = o_P(1),
\end{aligned}$$

by (A.51) and Lemma 9.

If  $\varrho = 0$ , then,

$$\begin{aligned}
& n \left| \tilde{\pi}_{P_i}^{\text{opt}}(\tilde{\theta}_P^{0*}) - \pi_{P_i}^{\ell_n}(\hat{\theta}) \right| \\
& \leq \frac{\left| \|\dot{m}(Z_i, \tilde{\theta}_P^{0*})\| \wedge H^{0*} - \|\dot{m}(Z_i, \hat{\theta})\| \wedge H_{\ell_n} \right|}{\Psi_{\ell_n}^{0*}} + \|\dot{m}(Z_i, \hat{\theta})\| \left| \frac{\Psi_{\ell_n}^{0*} - \Psi_{\ell_n}}{\Psi_{\ell_n}^{0*} \Psi_{\ell_n}} \right| \\
& \leq \frac{\left| \|\dot{m}(Z_i, \tilde{\theta}_P^{0*})\| - \|\dot{m}(Z_i, \hat{\theta})\| \right|}{\Psi_{\ell_n}^{0*}} + \|\dot{m}(Z_i, \hat{\theta})\| \frac{|\Psi_{\ell_n}^{0*} - \Psi_{\ell_n}|}{\Psi_{\ell_n}^{0*} \Psi_{\ell_n}} \\
& \quad + \frac{\|\dot{m}(Z_i, \tilde{\theta}_P^{0*})\|}{\Psi_{\ell_n}^{0*}} I\left\{ \|\dot{m}(Z_i, \hat{\theta})\| \geq H_{\ell_n} \right\} + \frac{H_{\ell_n}}{\Psi_{\ell_n}^{0*}} I\left\{ \|\dot{m}(Z_i, \hat{\theta})\| \geq H_{\ell_n} \right\} \\
& \quad + \frac{\|\dot{m}(Z_i, \hat{\theta})\|}{\Psi_{\ell_n}^{0*}} I\left\{ \|\dot{m}(Z_i, \tilde{\theta}_P^{0*})\| \geq H^{0*} \right\} + \frac{H^{0*}}{\Psi_{\ell_n}^{0*}} I\left\{ \|\dot{m}(Z_i, \tilde{\theta}_P^{0*})\| \geq H^{0*} \right\} \\
& \equiv \Delta_{3i} + \Delta_{4i} + \Delta_{5i} + \Delta_{6i} + \Delta_{7i} + \Delta_{8i}.
\end{aligned} \tag{A.69}$$

From (A.51) and Lemma 9, we know that

$$\frac{1}{n} \sum_{i=1}^n \|\dot{m}(Z_i, \hat{\theta})\|^2 \Delta_{3i} = o_P(1) \quad \text{and} \quad \frac{1}{n} \sum_{i=1}^n \|\dot{m}(Z_i, \hat{\theta})\|^2 \Delta_{4i} = o_P(1). \tag{A.70}$$

Note that

$$\begin{aligned}
& \frac{1}{n} \sum_{i=1}^n \|\dot{m}(Z_i, \hat{\theta})\|^2 \|\dot{m}(Z_i, \tilde{\theta}_P^{0*})\| I\left\{ \|\dot{m}(Z_i, \hat{\theta})\| \geq H_{\ell_n} \right\} \\
& \leq \left\{ \frac{1}{n} \sum_{i=1}^n \|\dot{m}(Z_i, \hat{\theta})\|^4 \right\}^{\frac{1}{2}} \left\{ \frac{1}{n} \sum_{i=1}^n \|\dot{m}(Z_i, \tilde{\theta}_P^{0*})\|^4 \right\}^{\frac{1}{4}} \left[ \frac{1}{n} \sum_{i=1}^n I\left\{ \|\dot{m}(Z_i, \hat{\theta})\| \geq H_{\ell_n} \right\} \right]^{\frac{1}{4}} \\
& = o_P(1),
\end{aligned}$$

because

$$\begin{aligned}
& \frac{1}{n} \sum_{i=1}^n I\left\{ \|\dot{m}(Z_i, \hat{\theta})\| \geq H_{\ell_n} \right\} = o_P(1), \quad \frac{1}{n} \sum_{i=1}^n \|\dot{m}(Z_i, \hat{\theta})\|^4 = O_P(1), \\
& \text{and} \quad \frac{1}{n} \sum_{i=1}^n \|\dot{m}(Z_i, \tilde{\theta}_P^{0*})\|^4 = O_P(1).
\end{aligned}$$

Thus,

$$\frac{1}{n} \sum_{i=1}^n \|\dot{m}(Z_i, \hat{\theta})\|^2 \Delta_{5i} = o_P(1). \tag{A.71}$$

If  $\|\dot{m}(Z, \boldsymbol{\theta})\|$  is bounded, then

$$\frac{H_{\varrho_n}}{n} \sum_{i=1}^n \|\dot{m}(Z_i, \hat{\boldsymbol{\theta}})\|^2 I\left\{\|\dot{m}(Z_i, \hat{\boldsymbol{\theta}})\| \geq H_{\varrho_n}\right\} \leq \frac{n - \lceil n(1 - \varrho_n) \rceil}{n} \|\dot{m}(Z, \hat{\boldsymbol{\theta}})\|_{(n)}^3 = o_P(1); \quad (\text{A.72})$$

otherwise

$$\frac{H_{\varrho_n}}{n} \sum_{i=1}^n \|\dot{m}(Z_i, \hat{\boldsymbol{\theta}})\|^2 I\left\{\|\dot{m}(Z_i, \hat{\boldsymbol{\theta}})\| \geq H_{\varrho_n}\right\} \leq \frac{1}{nH_{\varrho_n}} \sum_{i=1}^n \|\dot{m}(Z_i, \hat{\boldsymbol{\theta}})\|^4 = o_P(1). \quad (\text{A.73})$$

Thus we know that

$$\frac{1}{n} \sum_{i=1}^n \|\dot{m}(Z_i, \hat{\boldsymbol{\theta}})\|^2 \Delta_{6i} = o_P(1). \quad (\text{A.74})$$

Similarly, we can obtain that

$$\frac{1}{n} \sum_{i=1}^n \|\dot{m}(Z_i, \hat{\boldsymbol{\theta}})\|^2 \Delta_{7i} = o_P(1) \quad \text{and} \quad \frac{1}{n} \sum_{i=1}^n \|\dot{m}(Z_i, \hat{\boldsymbol{\theta}})\|^2 \Delta_{8i} = o_P(1). \quad (\text{A.75})$$

Combining (A.68), (A.69), (A.70), (A.71), (A.74), and (A.75), we know that

$$\|\Lambda_P^\alpha(\tilde{\boldsymbol{\theta}}_P^{0*}) - \Lambda_{P_{\varrho_n}}^\alpha(\hat{\boldsymbol{\theta}})\| = o_P(1).$$

To finish the proof for the case of  $\varrho = 0$ , we only need to show that  $\|\Lambda_{P_{\varrho_n}}^\alpha(\hat{\boldsymbol{\theta}}) - \Lambda_R^\alpha(\hat{\boldsymbol{\theta}})\| = o_P(1)$ . Let  $\Psi_\infty = \frac{1}{n} \sum_{i=1}^n \{\|\dot{m}(Z_i, \hat{\boldsymbol{\theta}})\|\}$ . We notice that

$$\begin{aligned} & n \left| \pi_{P_i}^{\varrho_n}(\hat{\boldsymbol{\theta}}) - \pi_{R_i}^{\text{opt}}(\hat{\boldsymbol{\theta}}) \right| \\ & \leq \frac{\|\dot{m}(Z_i, \hat{\boldsymbol{\theta}})\| \wedge H_{\varrho_n} - \|\dot{m}(Z_i, \hat{\boldsymbol{\theta}})\|}{\Psi_{\varrho_n}} + \|\dot{m}(Z_i, \hat{\boldsymbol{\theta}})\| \left| \frac{\Psi_{\varrho_n} - \Psi_\infty}{\Psi_{\varrho_n} \Psi_\infty} \right| \\ & \leq \frac{\|\dot{m}(Z_i, \hat{\boldsymbol{\theta}})\|}{\Psi_{\varrho_n}} I\left\{\|\dot{m}(Z_i, \hat{\boldsymbol{\theta}})\| \geq H_{\varrho_n}\right\} + \|\dot{m}(Z_i, \hat{\boldsymbol{\theta}})\| \left| \frac{\Psi_{\varrho_n} - \Psi_\infty}{\Psi_{\varrho_n} \Psi_\infty} \right| \\ & \leq \frac{\|\dot{m}(Z_i, \hat{\boldsymbol{\theta}})\|^2}{\Psi_{\varrho_n} H_{\varrho_n}} + \|\dot{m}(Z_i, \hat{\boldsymbol{\theta}})\| \left| \frac{\Psi_{\varrho_n} - \Psi_\infty}{\Psi_{\varrho_n} \Psi_\infty} \right| \equiv \Delta_{9i} + \Delta_{10i}. \end{aligned} \quad (\text{A.76})$$

With this result, it can be shown that

$$\frac{1}{n} \sum_{i=1}^n \|\dot{m}(Z_i, \hat{\boldsymbol{\theta}})\|^2 \Delta_{9i} = o_P(1) \quad \text{and} \quad \frac{1}{n} \sum_{i=1}^n \|\dot{m}(Z_i, \hat{\boldsymbol{\theta}})\|^2 \Delta_{10i} = o_P(1),$$

which indicates that  $\|\Lambda_{P_{\varrho_n}}^\alpha(\hat{\boldsymbol{\theta}}) - \Lambda_R^\alpha(\hat{\boldsymbol{\theta}})\| = o_P(1)$ .

From Slutsky's theorem, we know that give  $\mathcal{D}_n, \tilde{\boldsymbol{\theta}}_P^{0*}$ , as  $s_0, s$ , and  $n$  goes to infinity,

$$\sqrt{s}\{V_P^\alpha(\hat{\boldsymbol{\theta}})\}^{-1/2}(\tilde{\boldsymbol{\theta}}_P^\alpha - \hat{\boldsymbol{\theta}}) \rightarrow \mathbb{N}(\mathbf{0}, \mathbf{I}),$$

in conditional distribution. From similar arguments used in the proof of Theorem 1, we know that the convergence also holds in unconditional distribution, and this finishes the proof.  $\square$

*Proof of Remark 8.* Since  $\Lambda_R^{\text{opt}}(\hat{\boldsymbol{\theta}})$  has the minimum trace among all choices of sampling probabilities, if  $\alpha \neq 0$  then  $\text{tr}\{\Lambda_R^{\text{opt}}(\hat{\boldsymbol{\theta}})\} < \text{tr}\{\Lambda_R^\alpha(\hat{\boldsymbol{\theta}})\}$ . On the other hand,

$$\text{tr}\{\Lambda_R^\alpha(\hat{\boldsymbol{\theta}})\} = \frac{1}{n^2} \sum_{i=1}^n \frac{\|\dot{m}(Z_i, \hat{\boldsymbol{\theta}})\|^2}{(1 - \alpha)\pi_i^{\text{Ropt}} + \alpha \frac{1}{n}} < \frac{1}{n^2} \sum_{i=1}^n \frac{\|\dot{m}(Z_i, \hat{\boldsymbol{\theta}})\|^2}{(1 - \alpha)\pi_i^{\text{Ropt}}}$$

---

$$= \frac{1}{(1-\alpha)n^2} \left\{ \sum_{i=1}^n \|\dot{m}(Z_i, \hat{\theta})\| \right\}^2 = \frac{\text{tr}_{opt}\{\Lambda_R(\hat{\theta})\}}{1-\alpha},$$

and this finishes the proof for  $\Lambda_R^\alpha(\hat{\theta})$  from subsampling with replacement. For  $\Lambda_P^\alpha(\hat{\theta})$  from Poisson subsampling, the proof is similar. □

## References

- Chanda, K. (1971). Asymptotic distribution of sample quantiles for exchangeable random variables. *Calcutta Statistical Association Bulletin*, 20(4):135–142.
- Cheng, G. and Huang, J. (2010). Bootstrap consistency for general semiparametric m-estimation. *The Annals of Statistics*, 38(5):2884–2915.
- Hjort, N. L. and Pollard, D. (2011). Asymptotics for minimisers of convex processes. *arXiv preprint arXiv:1107.3806*.
- Nocedal, J. and Wright, S. J. (1999). *Numerical Optimization*. Springer.
- van der Vaart, A. (1998). *Asymptotic Statistics*. Cambridge University Press, London.
- Xiong, S. and Li, G. (2008). Some results on the convergence of conditional distributions. *Statistics & Probability Letters*, 78(18):3249–3253.
